# Supplementary material for: Discovery of tert-Butyl Ester Based 6-Diazo-5-oxo-l-norleucine Prodrugs for Enhanced Metabolic Stability and Tumor Delivery
Source: PubMed Central journal article supplement (PMC10683027; doi:10.1021/acs.jmedchem.3c01681), 2023-11-10
Supplement: jm3c01681_si_001.pdf [file jm3c01681_si_001.pdf]

# Supporting information

## *Discovery of tert-butyl ester-based DON prodrugs for enhanced metabolic stability and tumor delivery*

**Authors:** Kateřina Novotná<sup>°1,8,9</sup>, Lukáš Tenora<sup>°1,8</sup>, Eva Prchalová<sup>1,8</sup>, James Paule<sup>1</sup>, Jesse Alt<sup>1</sup>, Vijay Veeravalli<sup>1</sup>, Jenny Lam<sup>1</sup>, Ying Wu<sup>1</sup>, Ivan Šnajdr<sup>8</sup>, Sadakatali Gori<sup>1</sup>, Vijaya Saradhi Mettu<sup>1</sup>, Takashi Tsukamoto<sup>1</sup>, Pavel Majer<sup>8\*</sup>, Barbara S. Slusher<sup>1,2,3,4,5,6,7\*</sup> and Rana Rais<sup>1,2,4\*</sup>

<sup>1</sup>Johns Hopkins Drug Discovery, Departments of <sup>2</sup>Neurology, <sup>3</sup>Psychiatry and Behavioral Sciences, <sup>4</sup>Pharmacology and Molecular Sciences, <sup>5</sup>Neuroscience, <sup>6</sup>Medicine, <sup>7</sup>Oncology, Johns Hopkins School of Medicine, Baltimore, Maryland 21205, U.S.A.

<sup>8</sup>Institute of Organic Chemistry and Biochemistry, Academy of Sciences of the Czech Republic v.v.i., Prague, 16600, Czech Republic

<sup>9</sup>Department of Organic Chemistry, Charles University, Faculty of Science, Prague, 12800, Czech Republic

*°these authors have equally contributed to this manuscript*

### **Address Correspondence to:**

\*Rana Rais, PhD, Johns Hopkins Drug Discovery, 855 North Wolfe Street, Baltimore, Maryland, USA 21205, Phone: 410-502-0497, Fax: 410-614-0659, E-mail: [rrais2@jhmi.edu](mailto:rrais2@jhmi.edu)

\*Barbara S. Slusher, PhD, Johns Hopkins Drug Discovery, 855 North Wolfe Street, Baltimore, Maryland, USA 21205, Phone: 410-960-6162, Fax: 410-614-0659, E-mail: [bslusher@jhmi.edu](mailto:bslusher@jhmi.edu)

\*Pavel Majer, CSc, Institute of Organic Chemistry and Biochemistry, Academy of Sciences of the Czech Republic vvi, Flemingovo nam. 2, 166 10 Prague, Czech Republic, Phone: +420-220-183-125, E-mail: [majer@uochb.cas.cz](mailto:majer@uochb.cas.cz)

## **Table of contents**

|                                                                           |           |
|---------------------------------------------------------------------------|-----------|
| 1. $^1\text{H}$ and $^{13}\text{C}$ NMR spectra of prodrugs <b>P1-P21</b> | S2 – S23  |
| 2. HPLC traces of prodrugs <b>P1-P21</b>                                  | S24 – S30 |
| 3. Table of $\text{clogD}_{7.4}$ values for prodrugs <b>P1-P21</b>        | S31       |
| 4. Aqueous stability of DRP 104 and <b>P11</b>                            | S32       |

# <sup>1</sup>H and <sup>13</sup>C NMR spectra of prodrugs P1-P21:

## <sup>1</sup>H and <sup>13</sup>C NMR Spectra of compound P1.

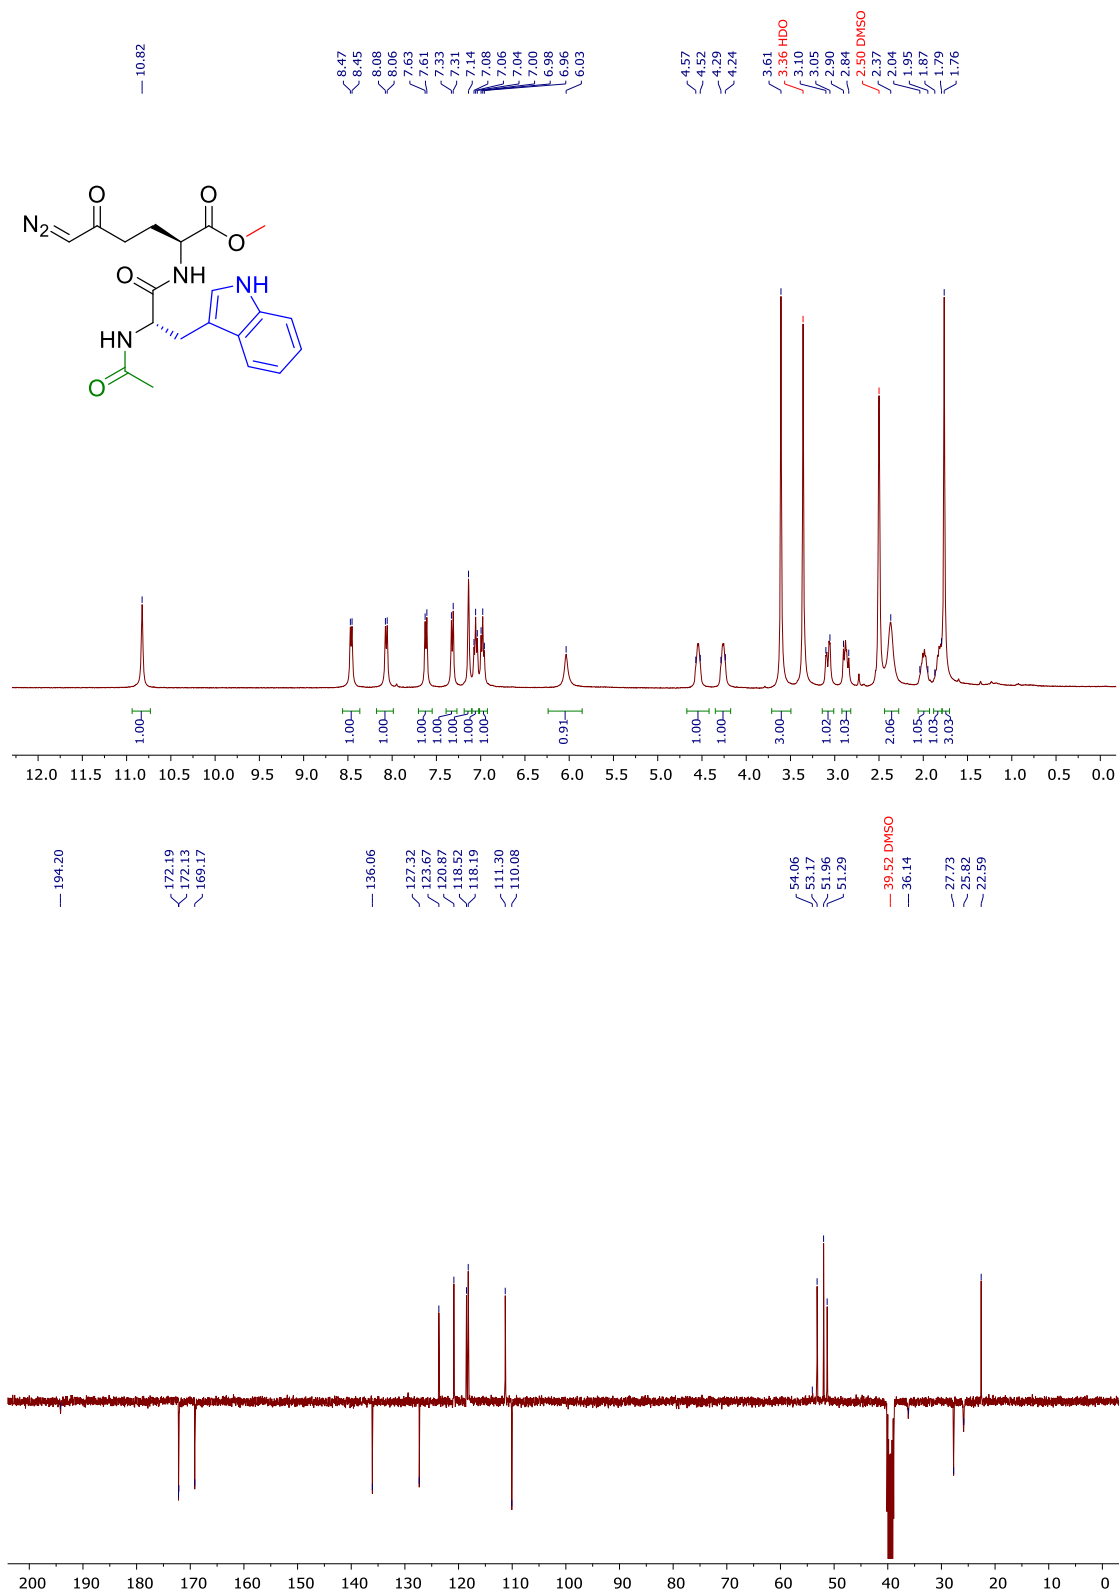

# $^1\text{H}$ and $^{13}\text{C}$ NMR Spectra of compound **P2**.

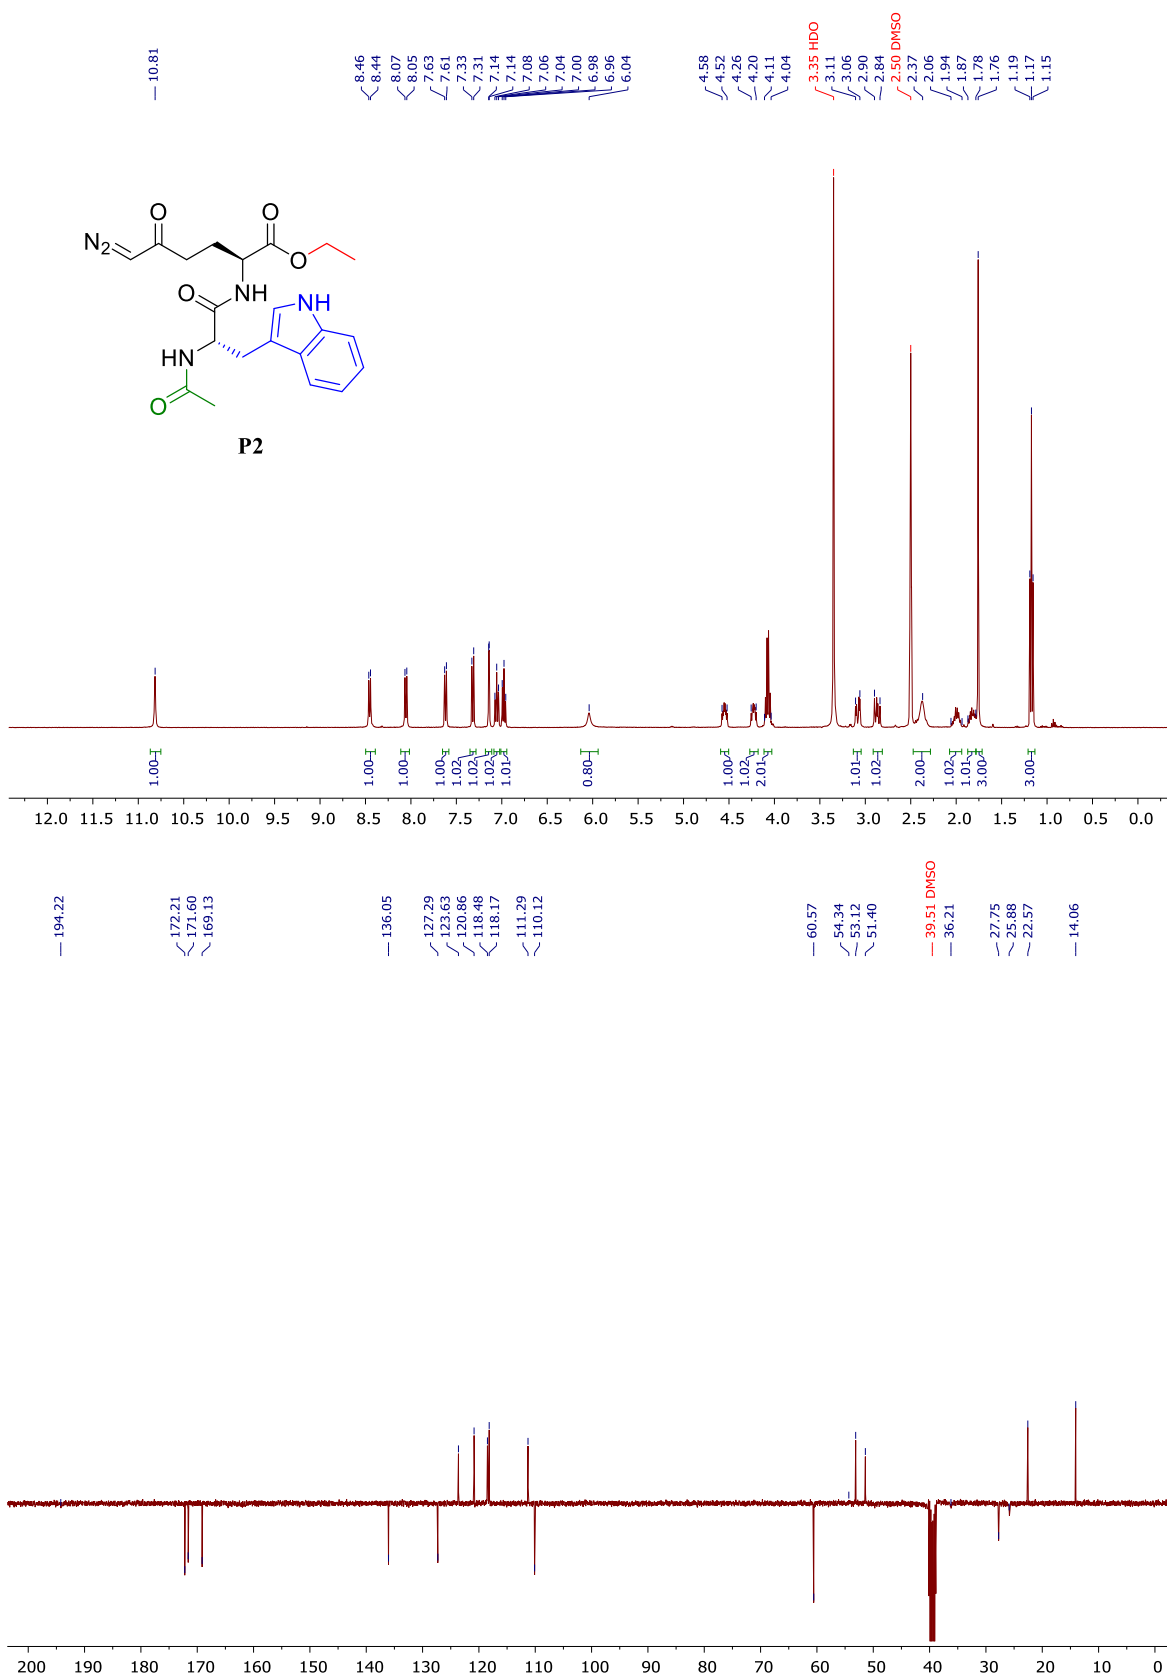

# $^1\text{H}$ and $^{13}\text{C}$ NMR Spectra of compound **P3**.

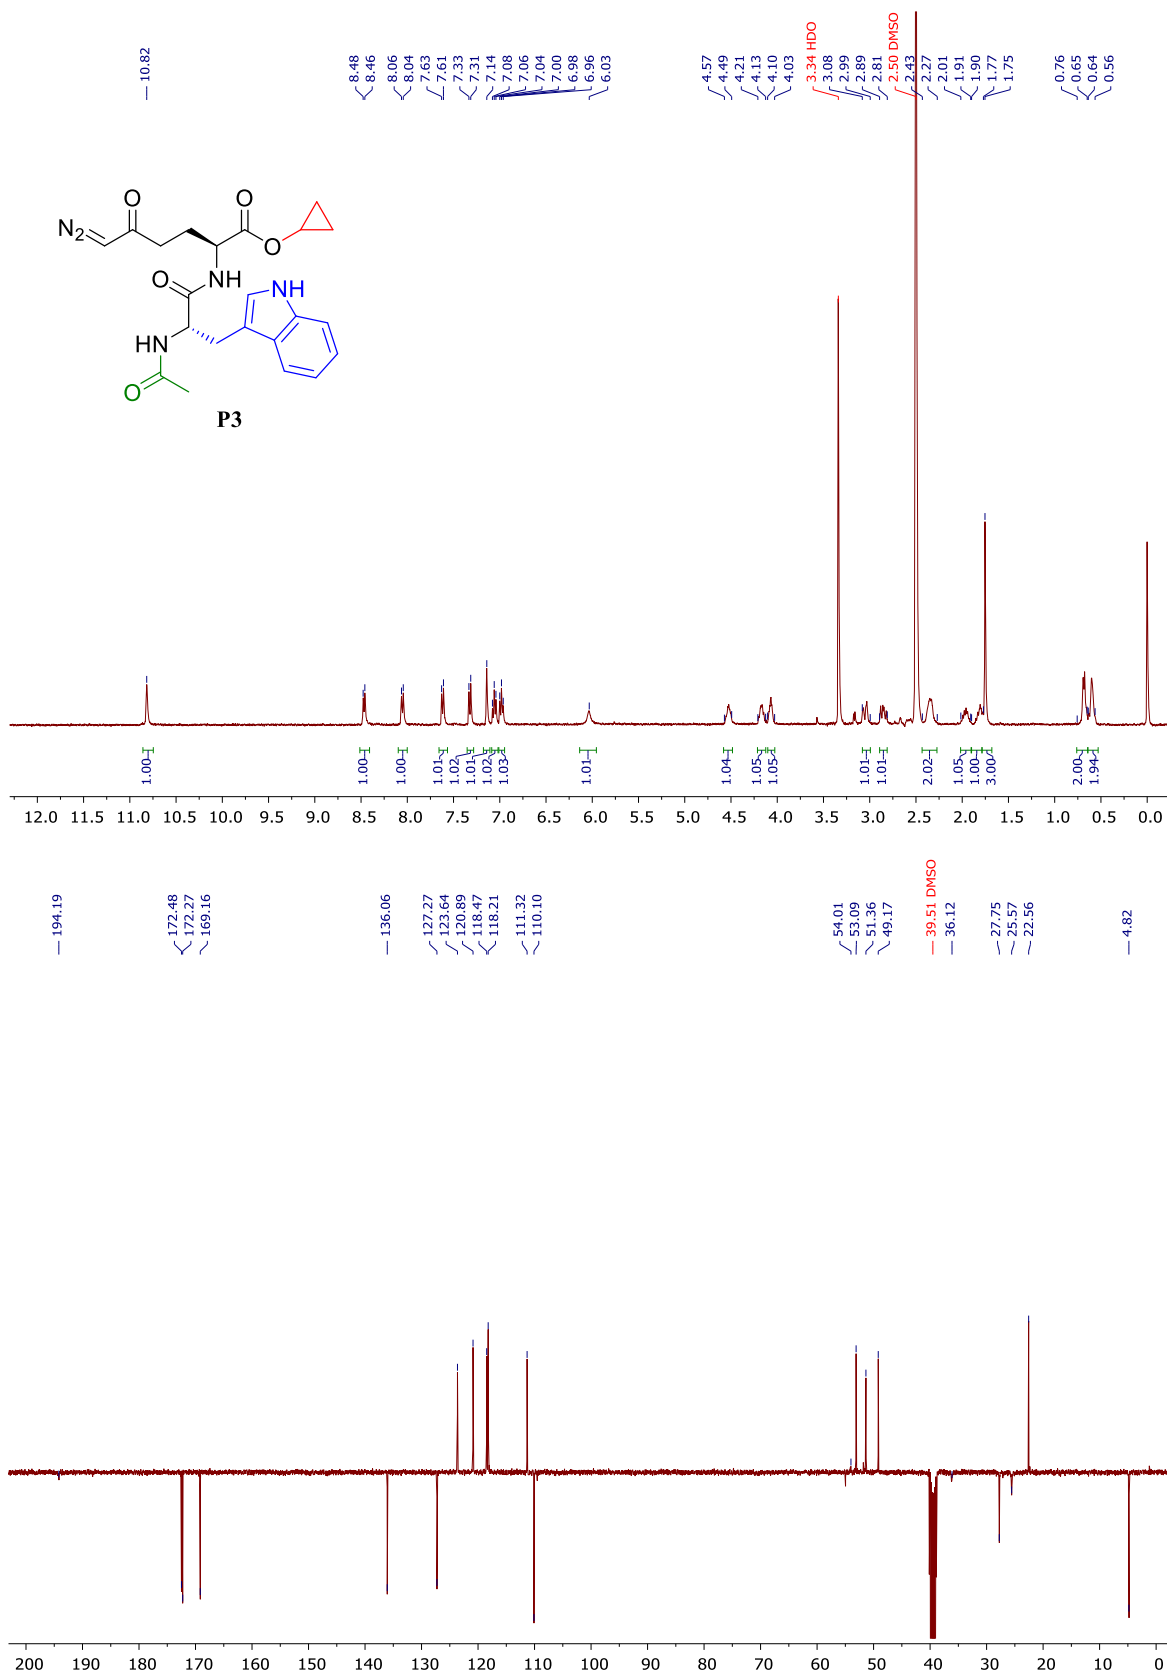

# <sup>1</sup>H and <sup>13</sup>C NMR Spectra of compound P4.

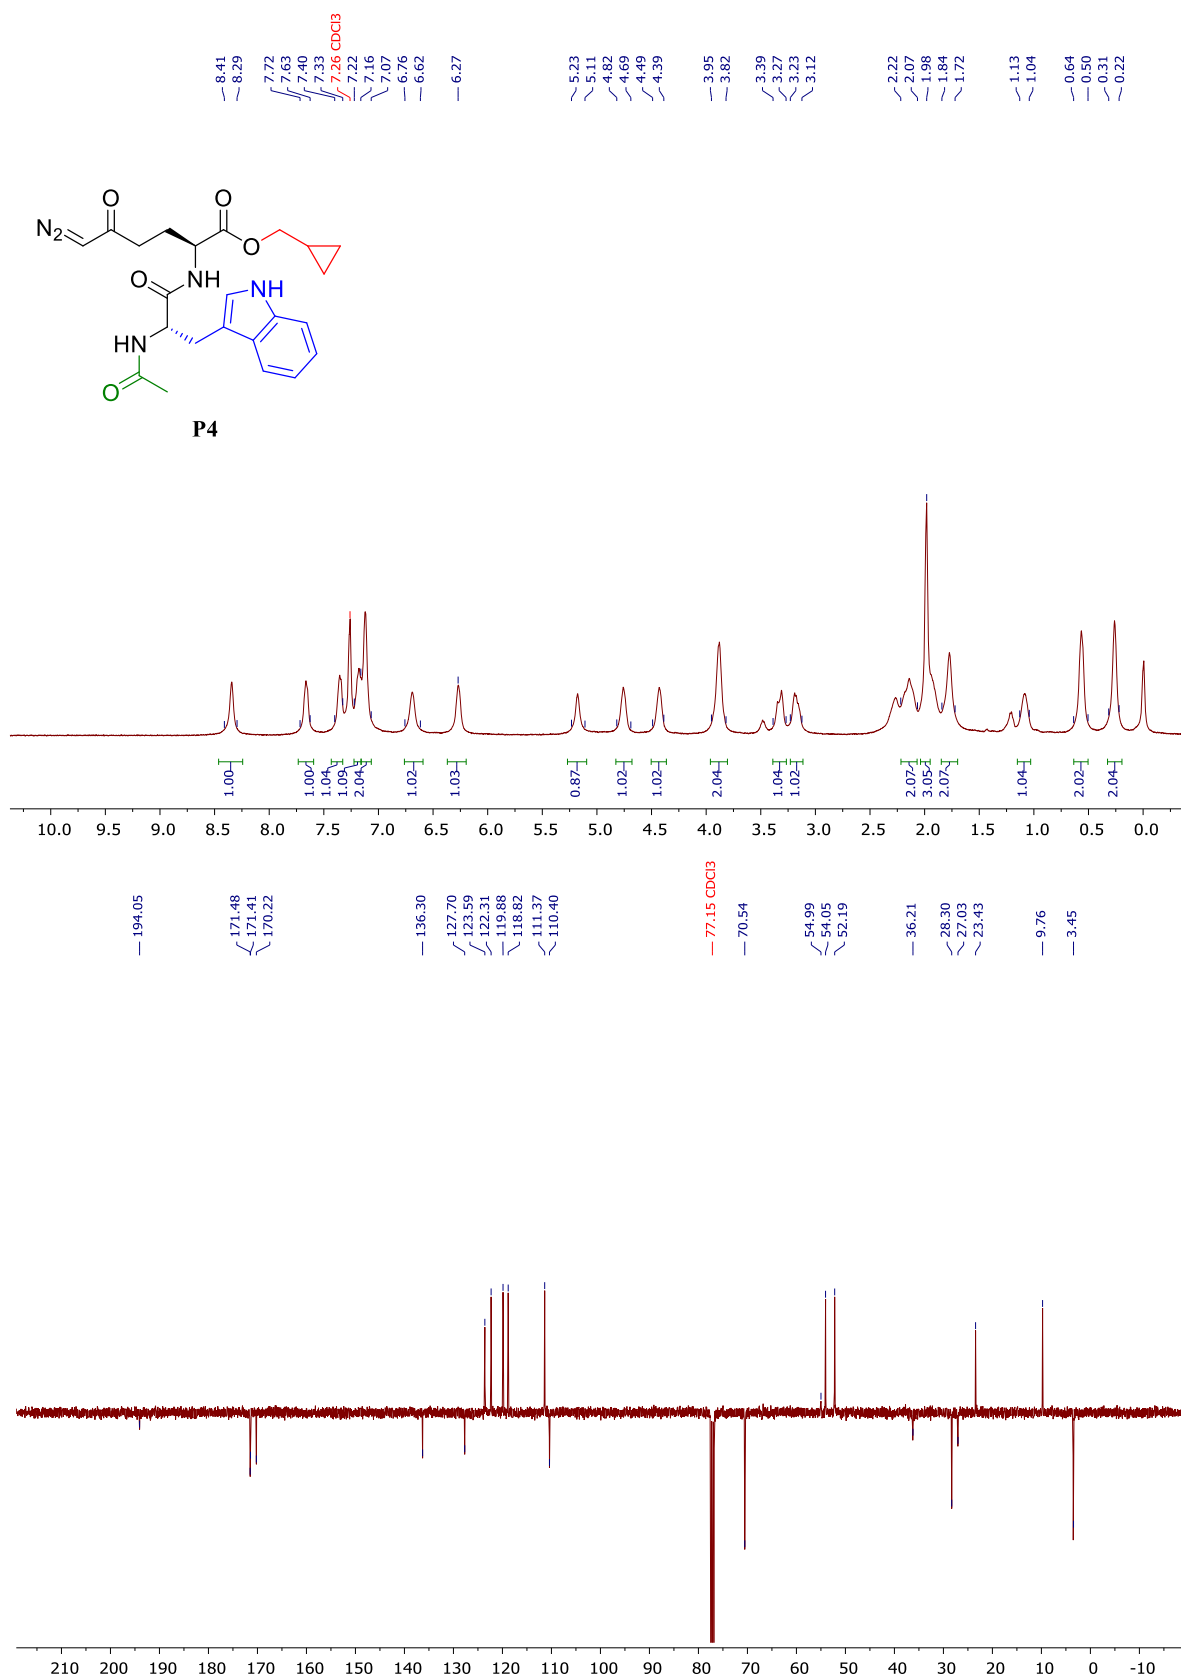

$^1\text{H}$  and  $^{13}\text{C}$  NMR Spectra of compound **P5**.

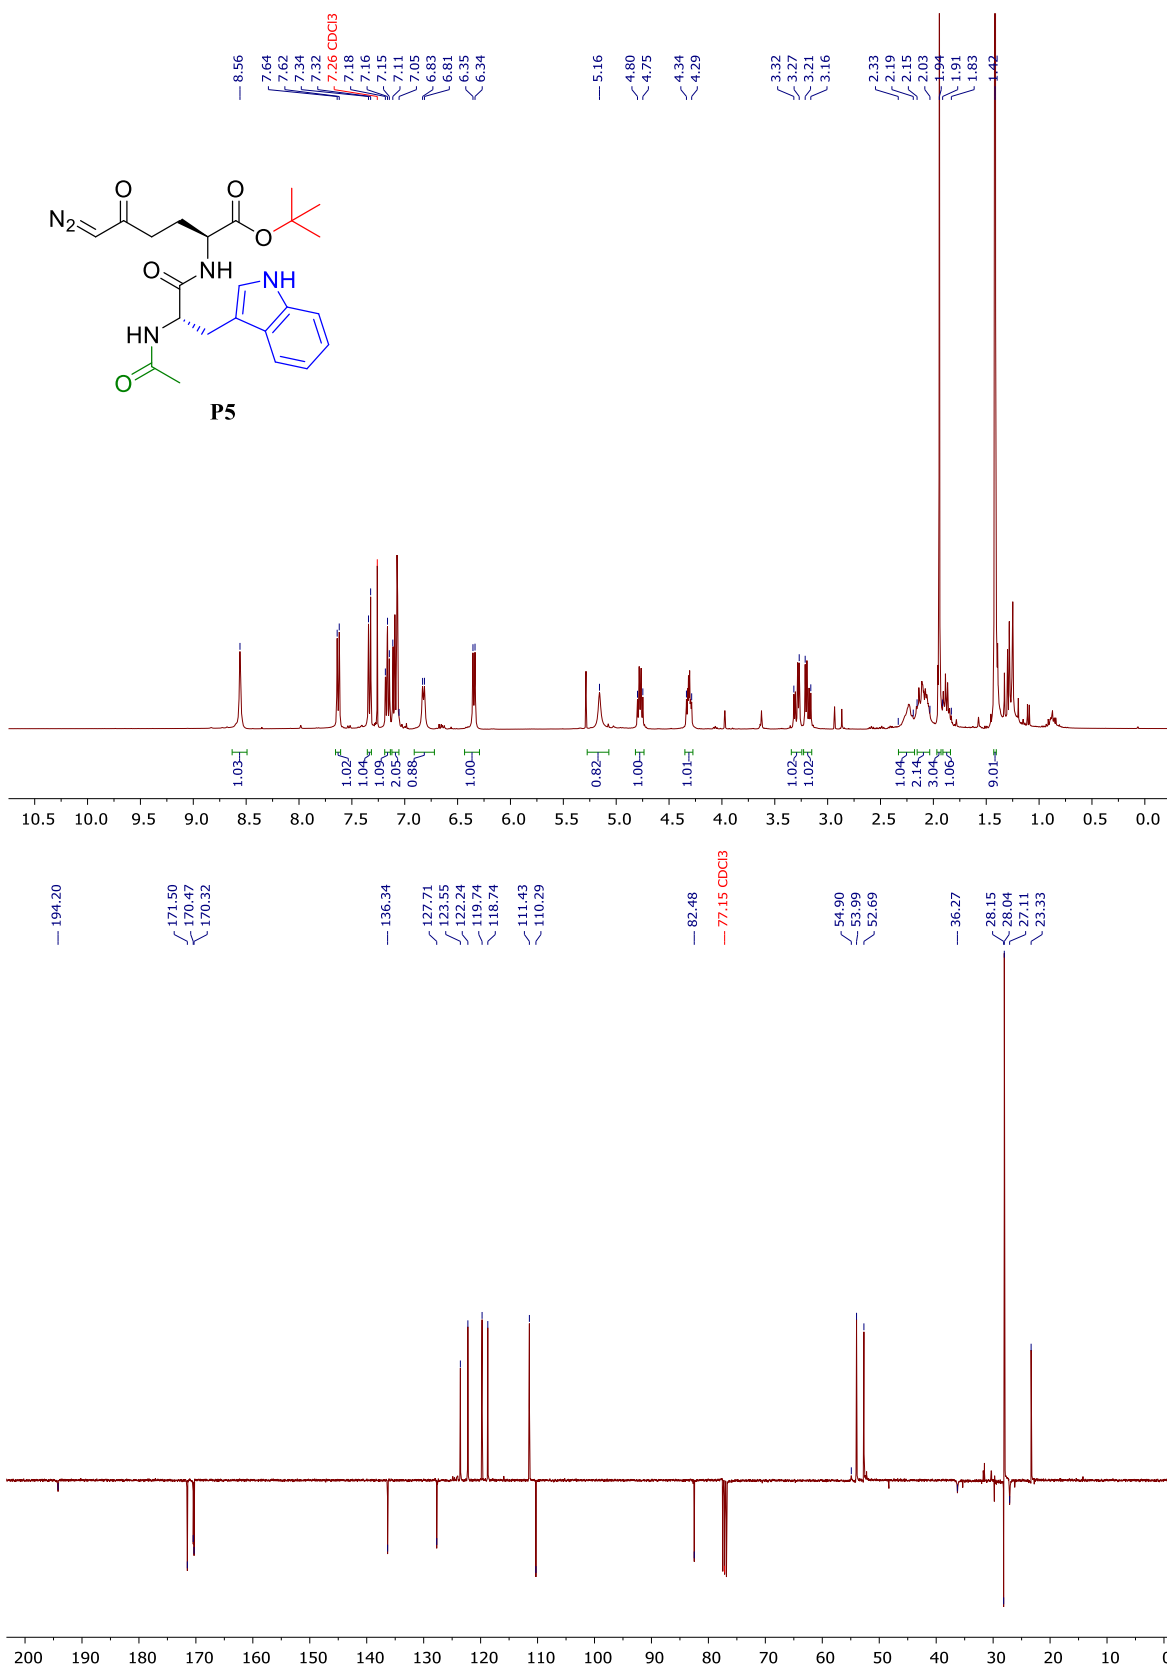

# $^1\text{H}$ and $^{13}\text{C}$ NMR Spectra of compound P6.

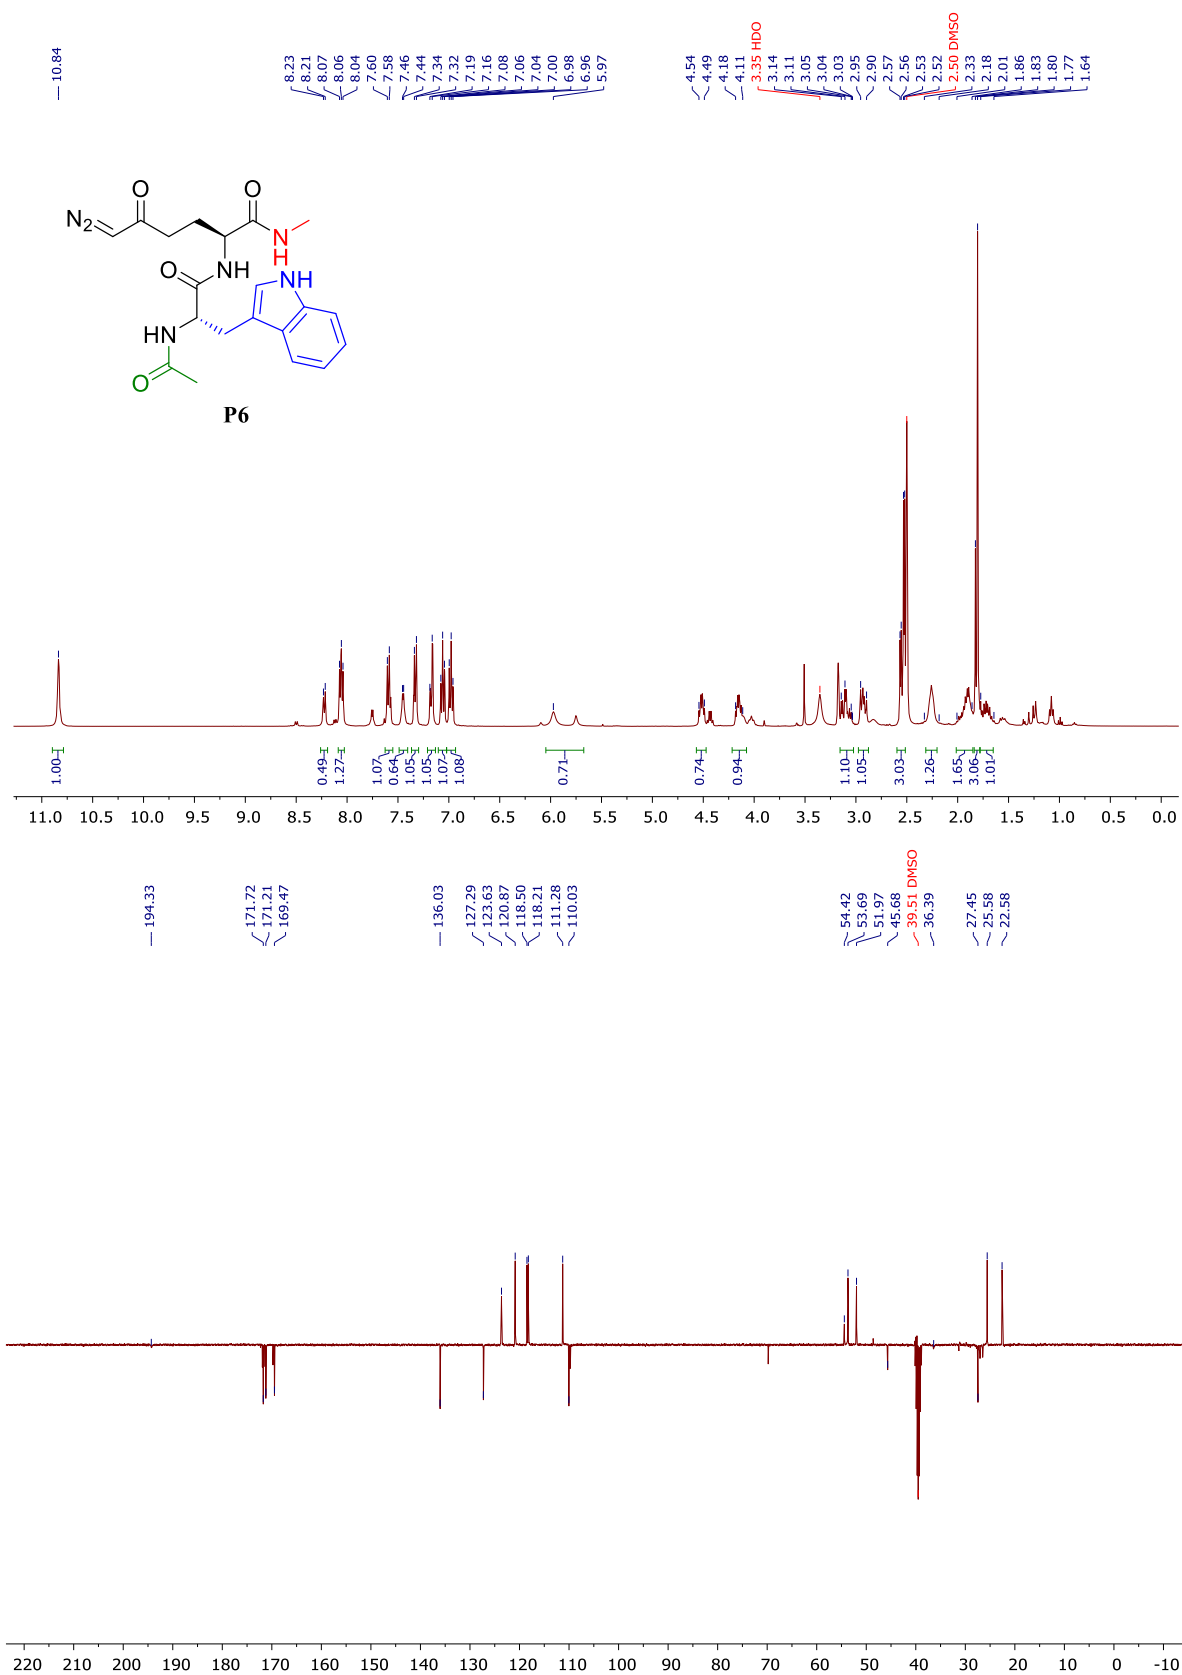



# $^1\text{H}$ and $^{13}\text{C}$ NMR Spectra of compound **P7**.

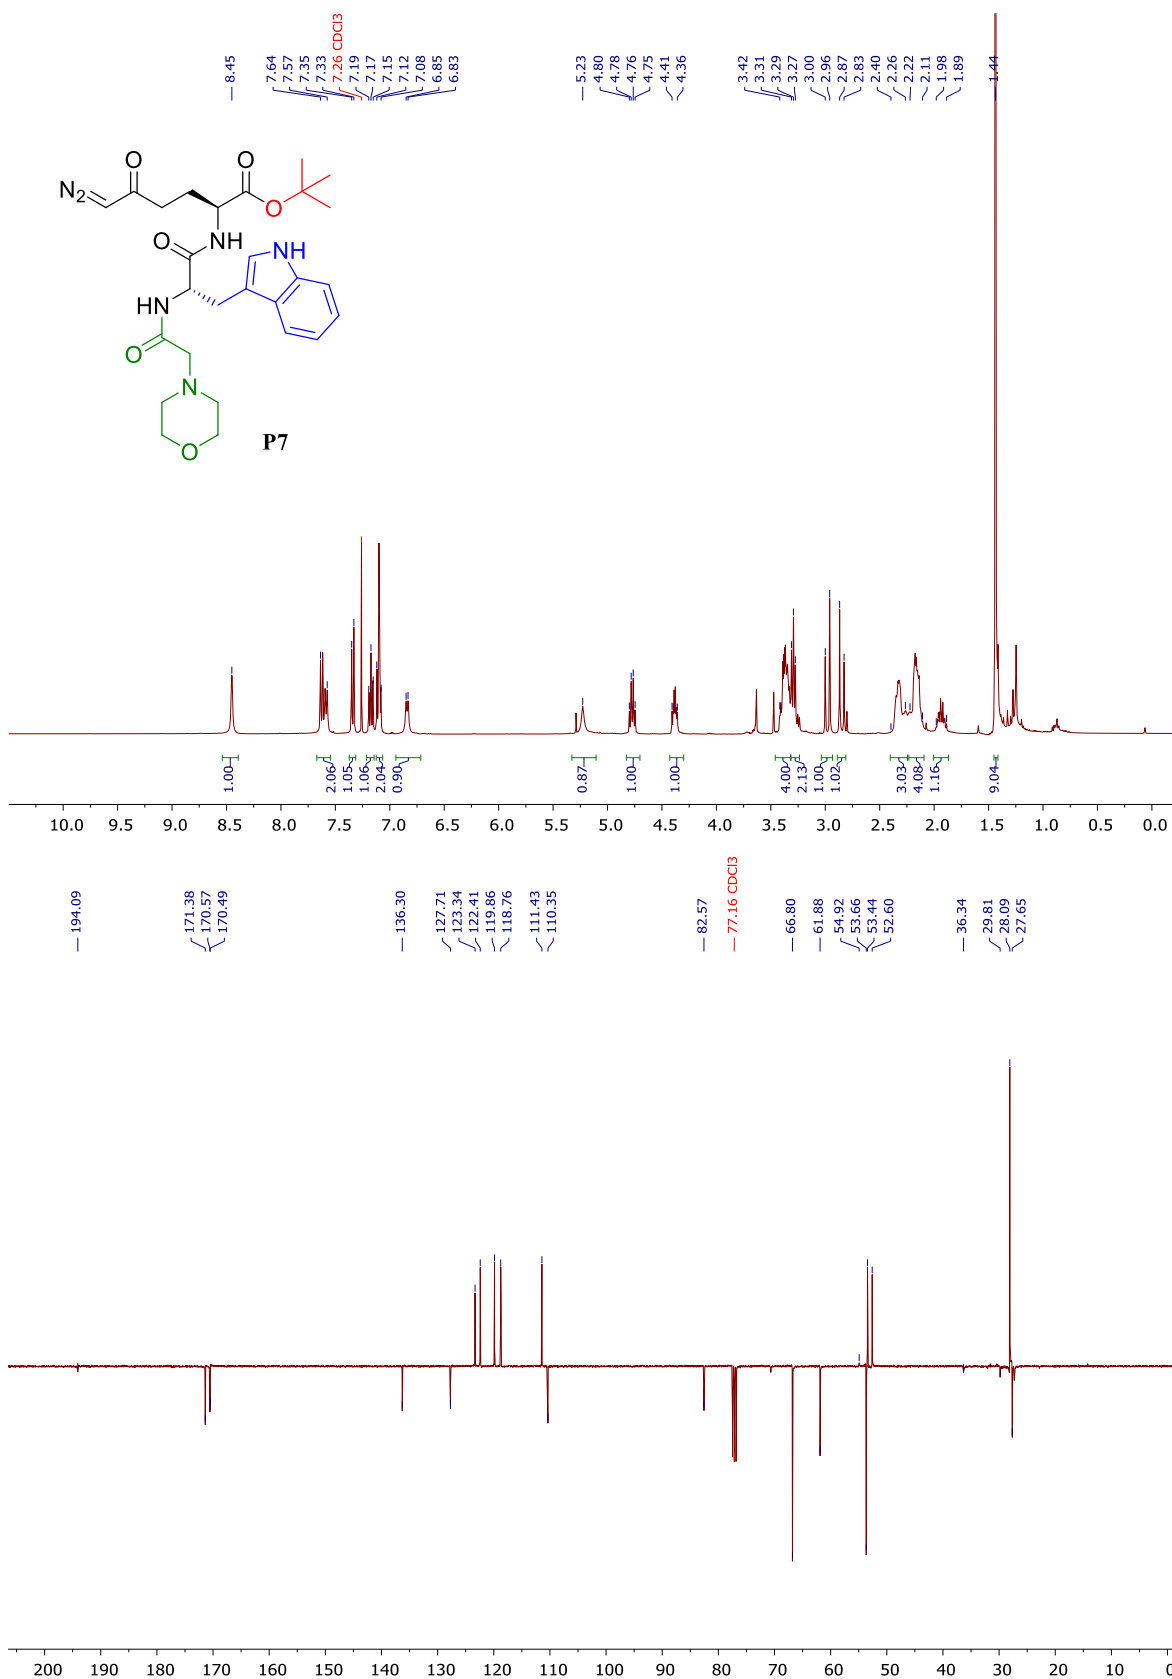

# $^1\text{H}$ and $^{13}\text{C}$ NMR Spectra of compound **P8**.

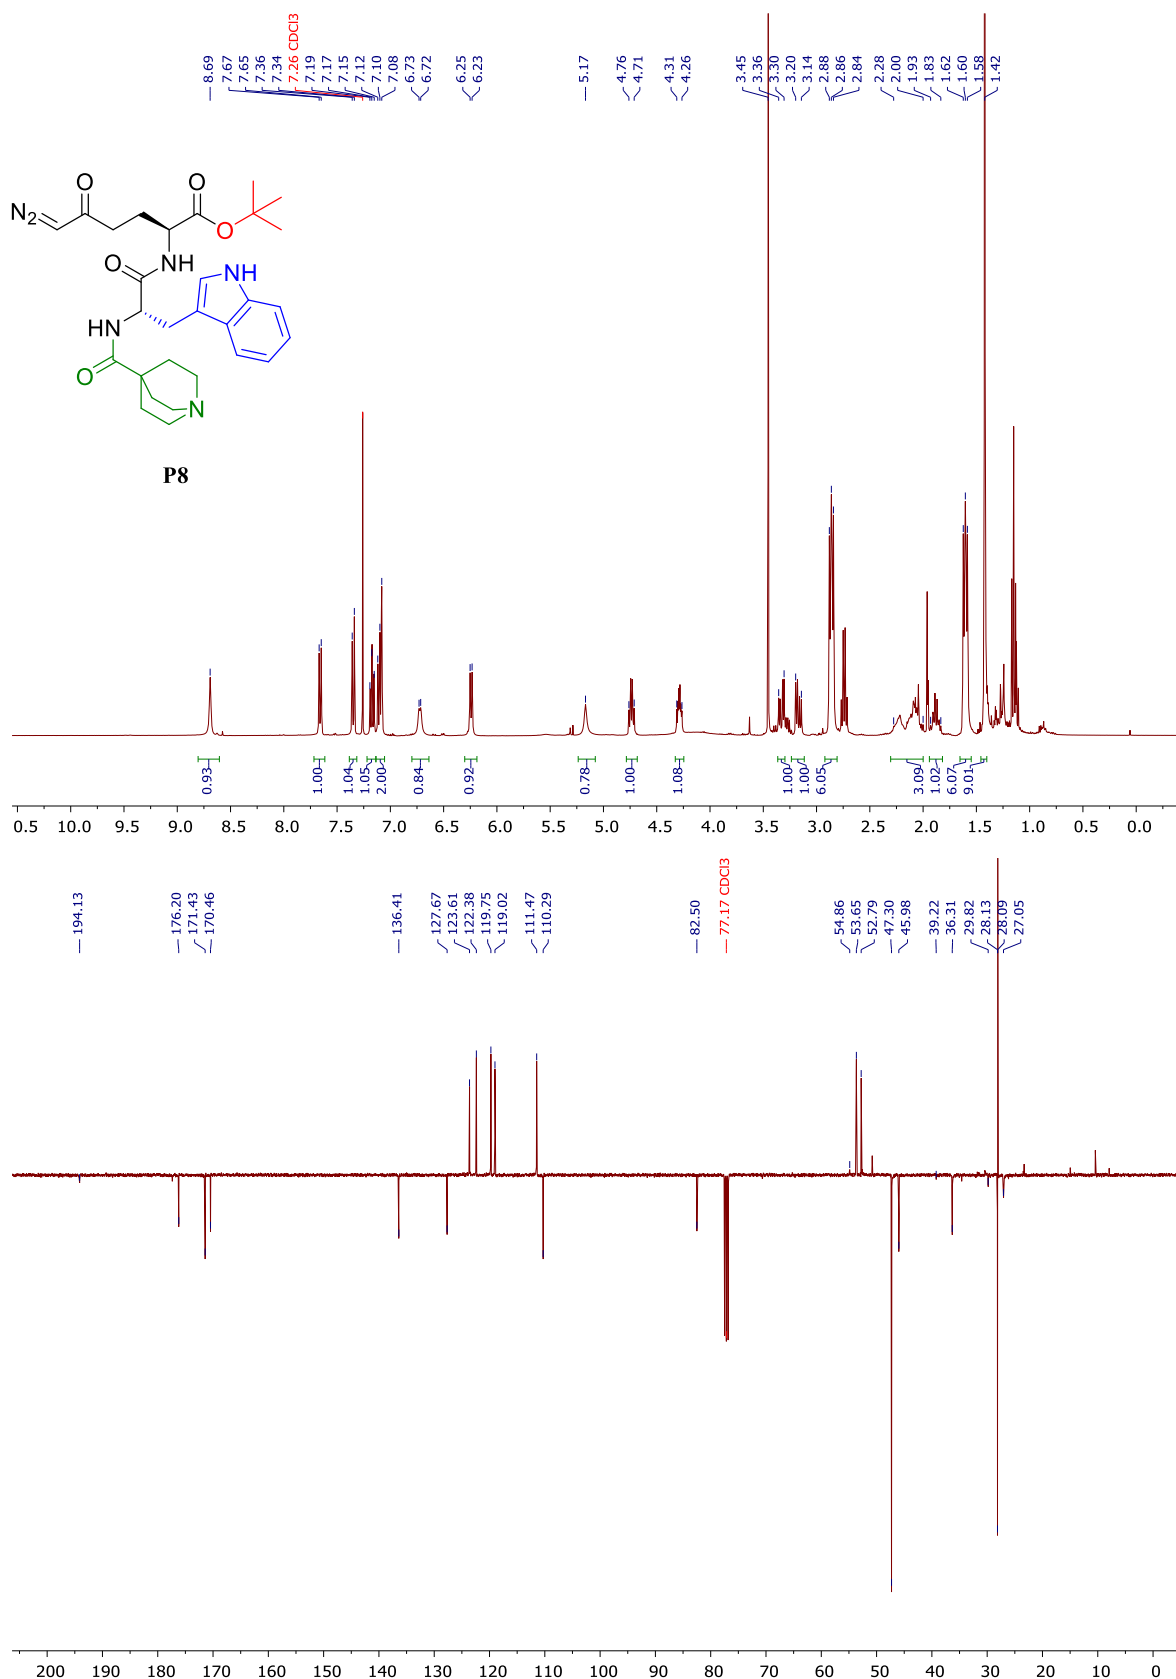

# $^1\text{H}$ and $^{13}\text{C}$ NMR Spectra of compound **P9**.

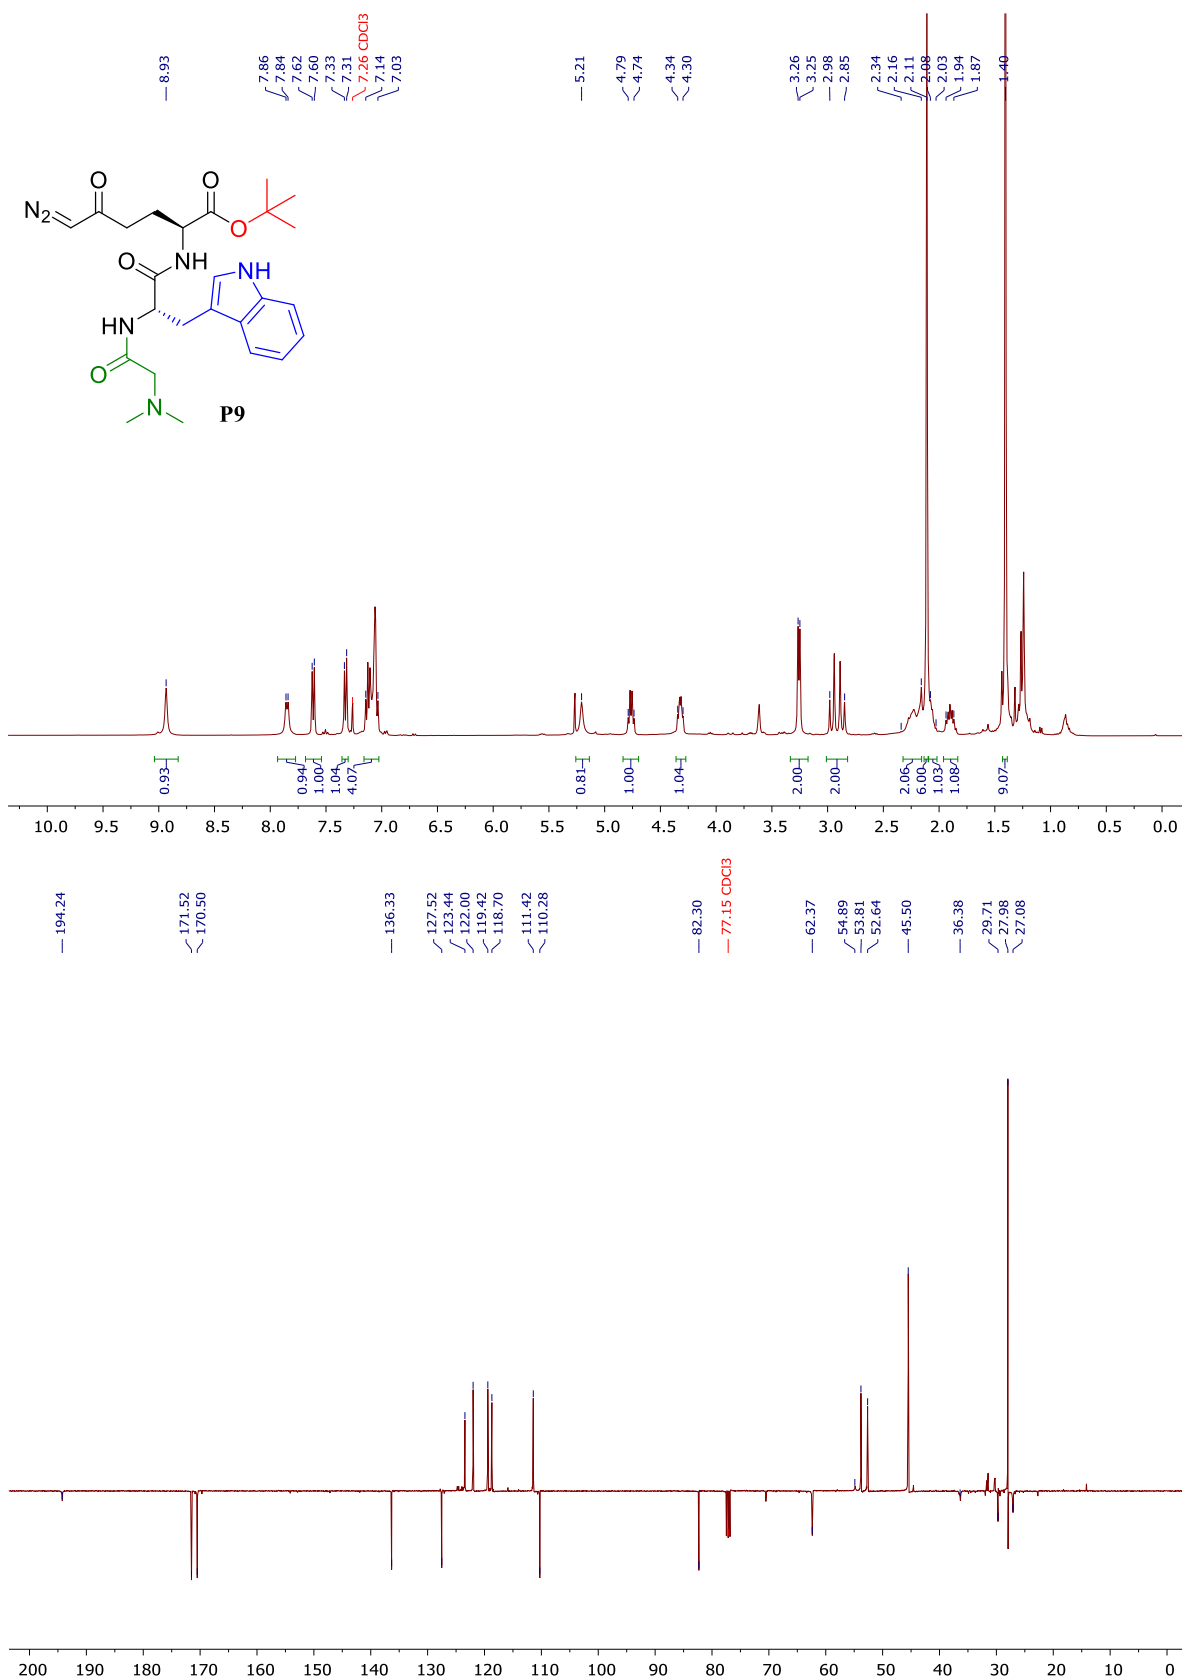

# <sup>1</sup>H and <sup>13</sup>C NMR Spectra of compound P10.

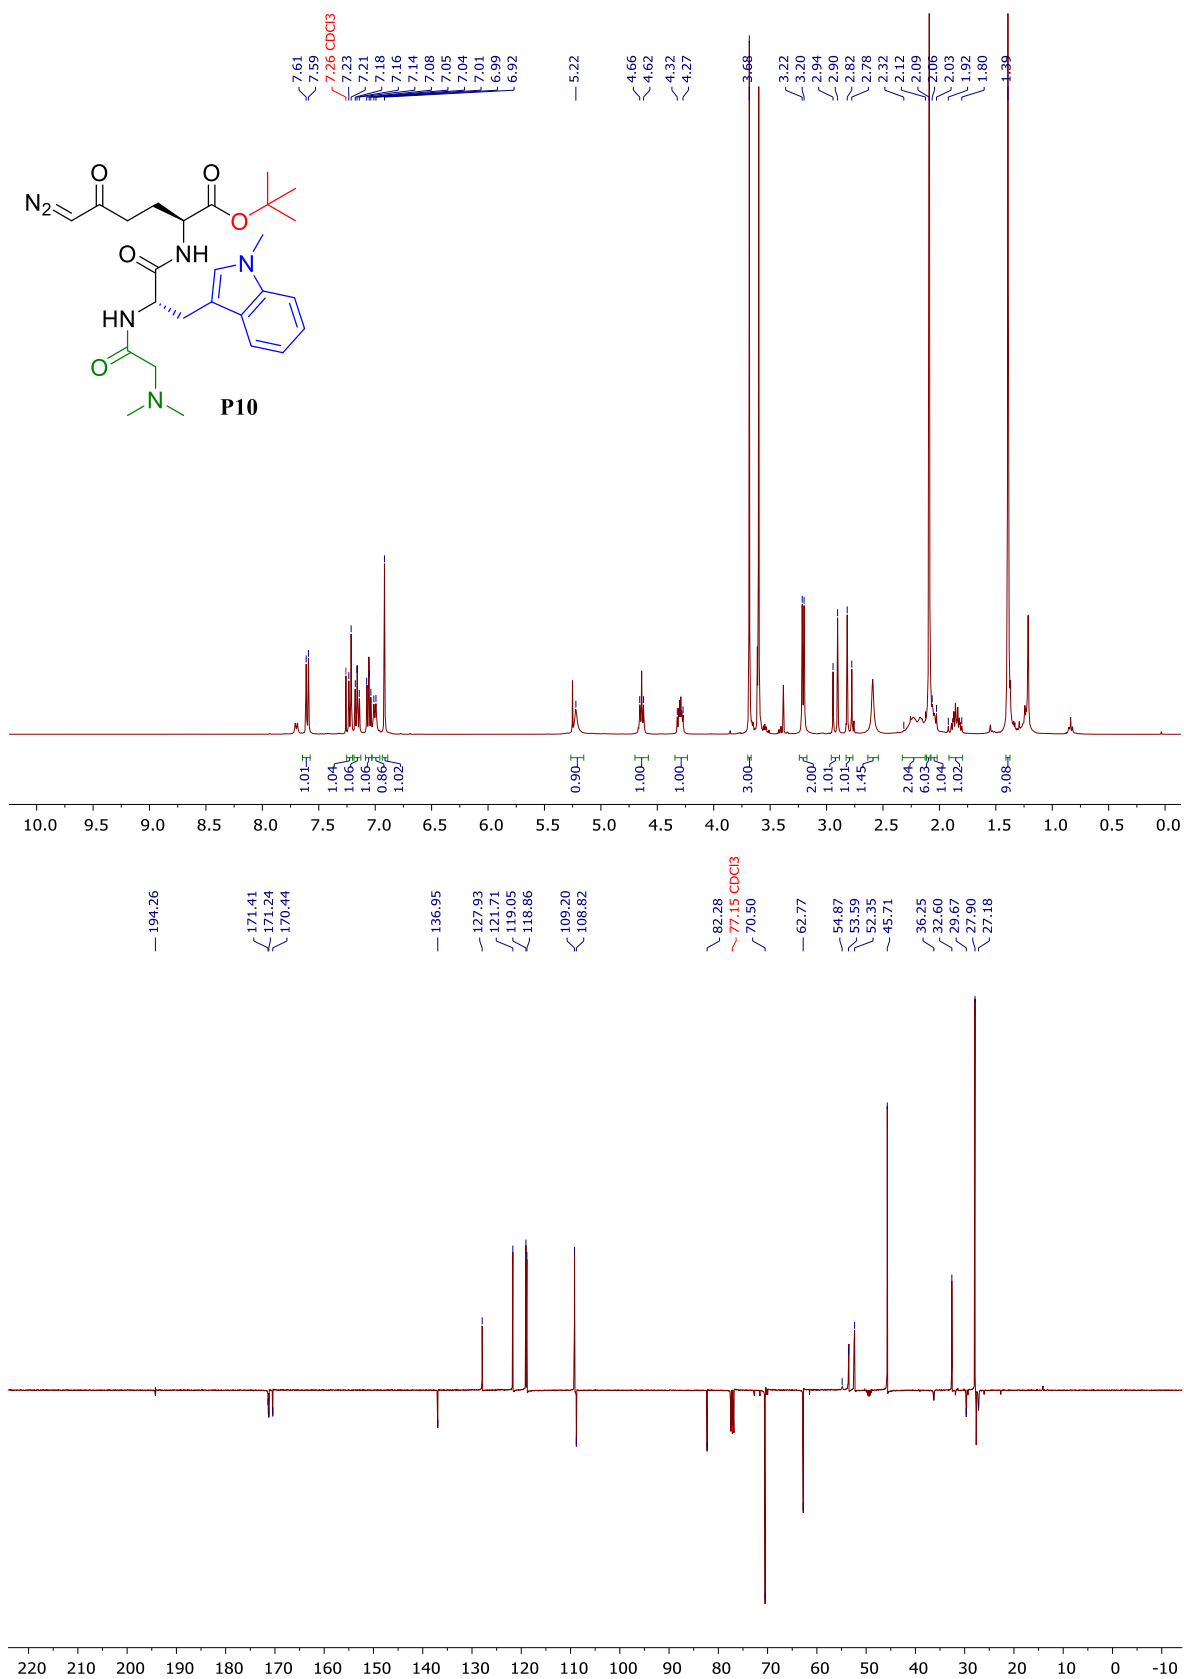

# $^1\text{H}$ and $^{13}\text{C}$ NMR Spectra of compound **P11**.

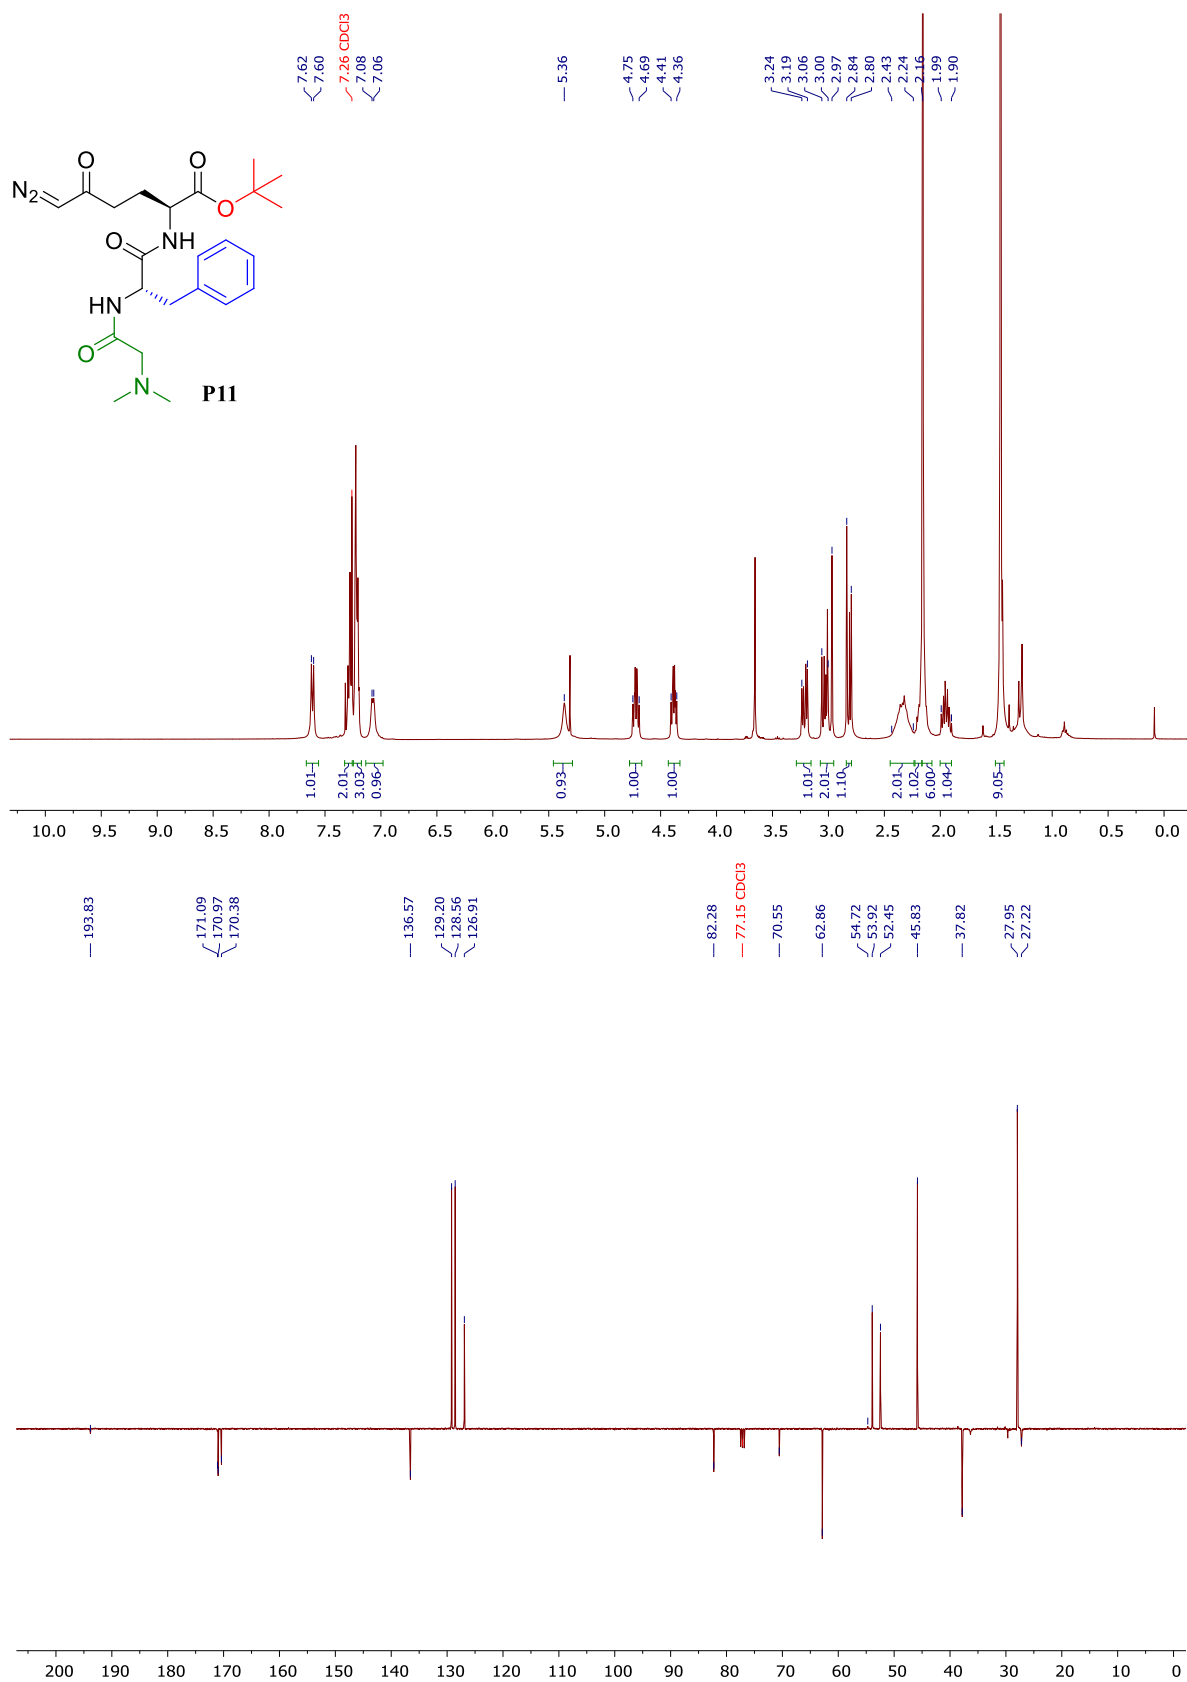

# <sup>1</sup>H and <sup>13</sup>C NMR Spectra of compound P12.

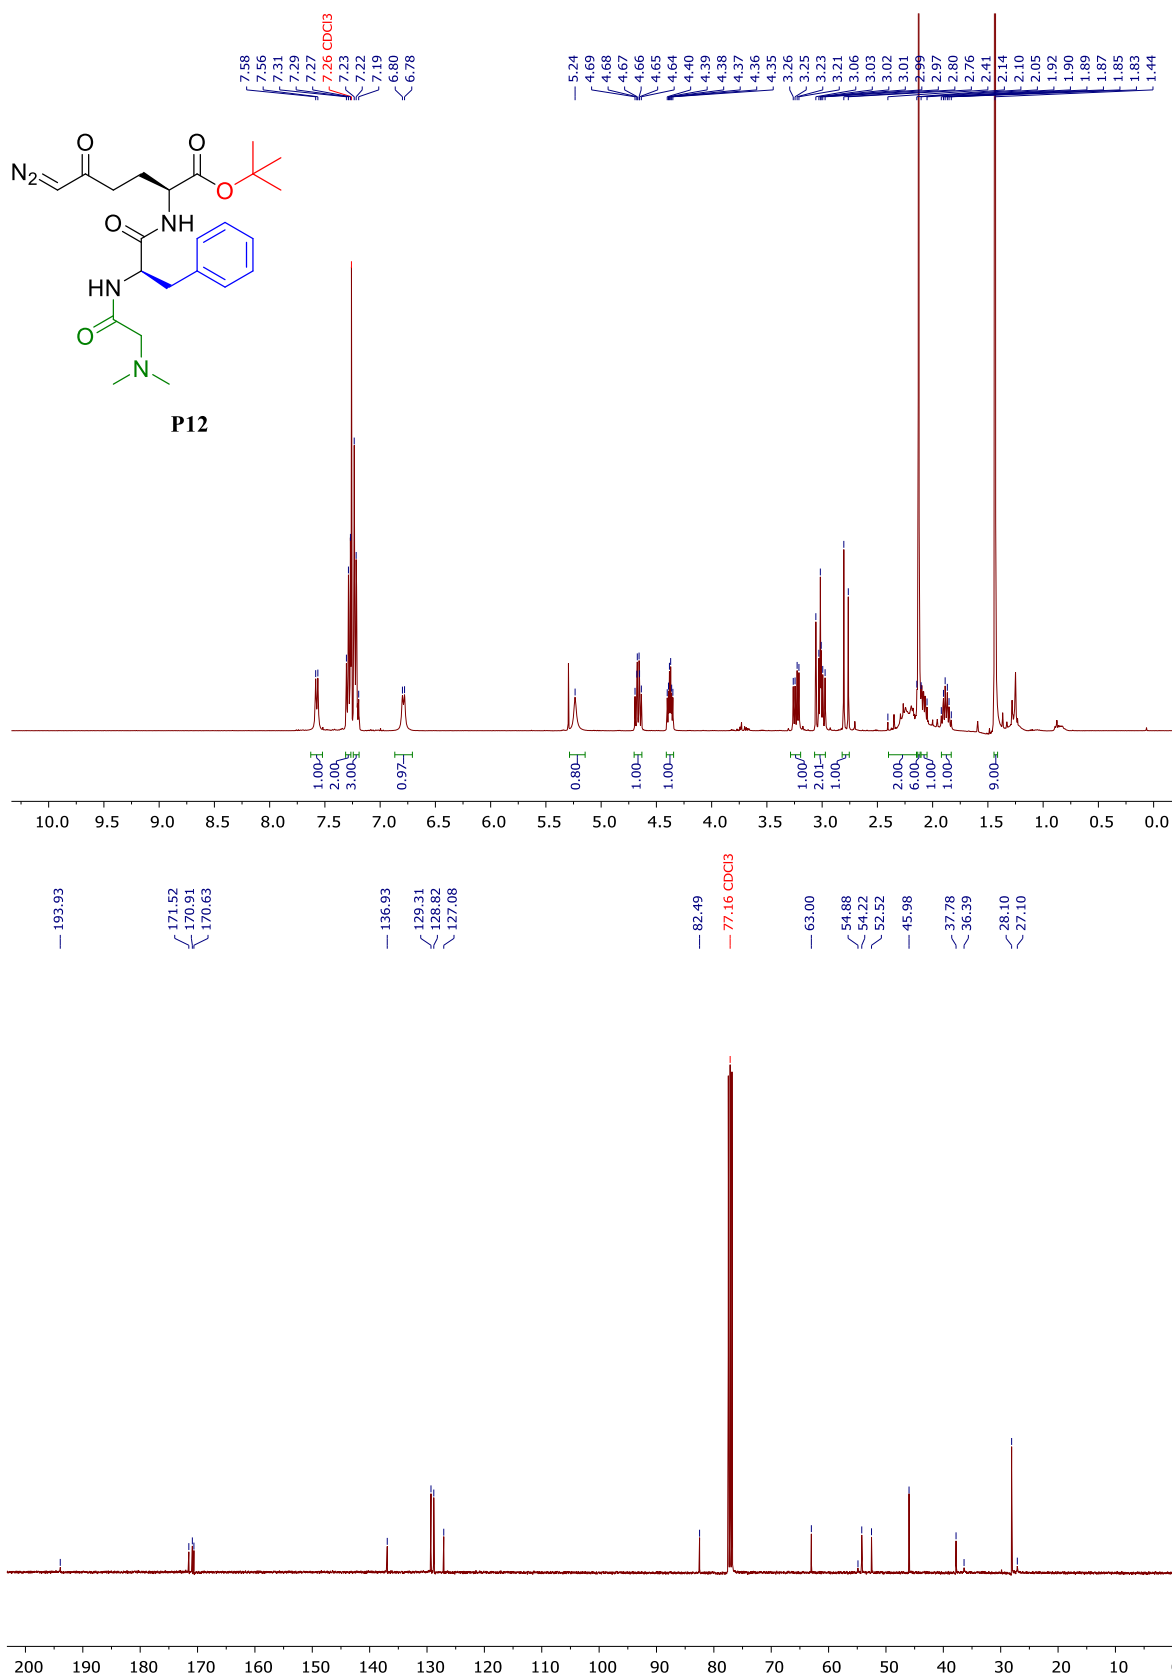

<sup>1</sup>H and <sup>13</sup>C NMR Spectra of compound **P13**.

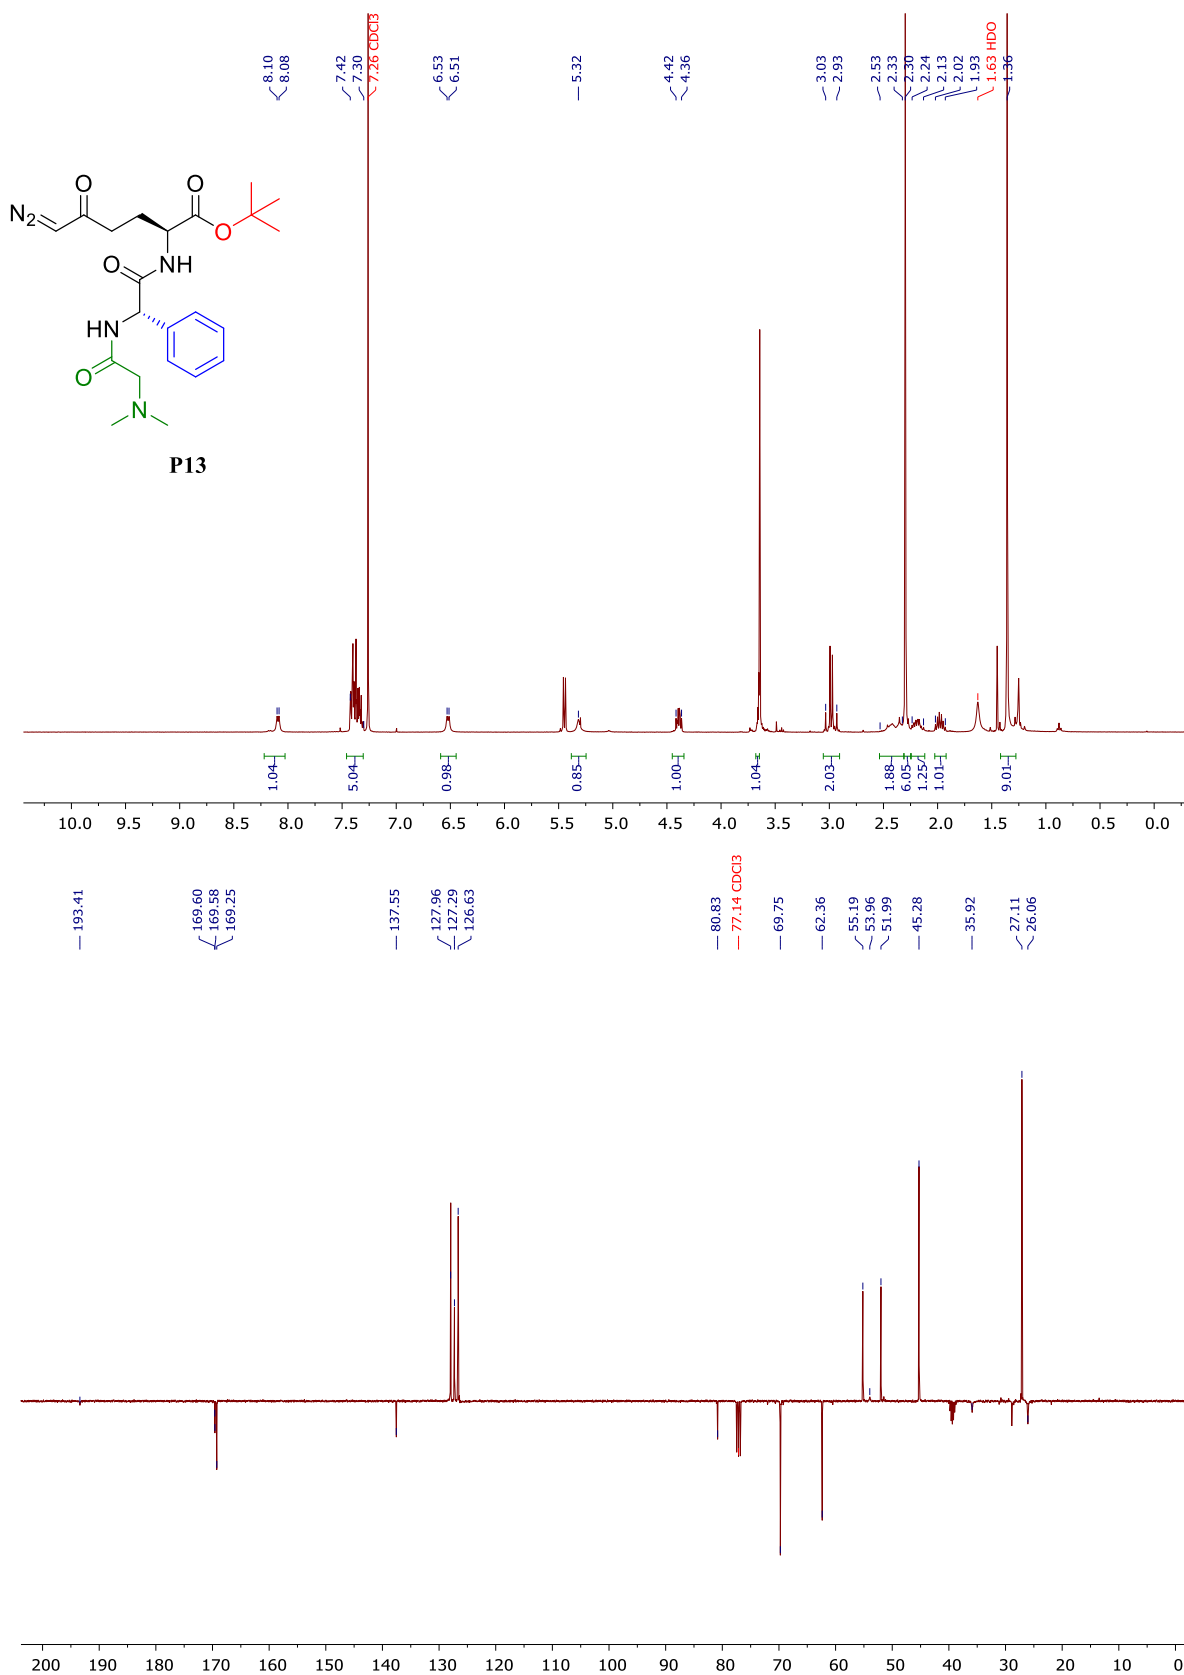

# <sup>1</sup>H and <sup>13</sup>C NMR Spectra of compound P14.

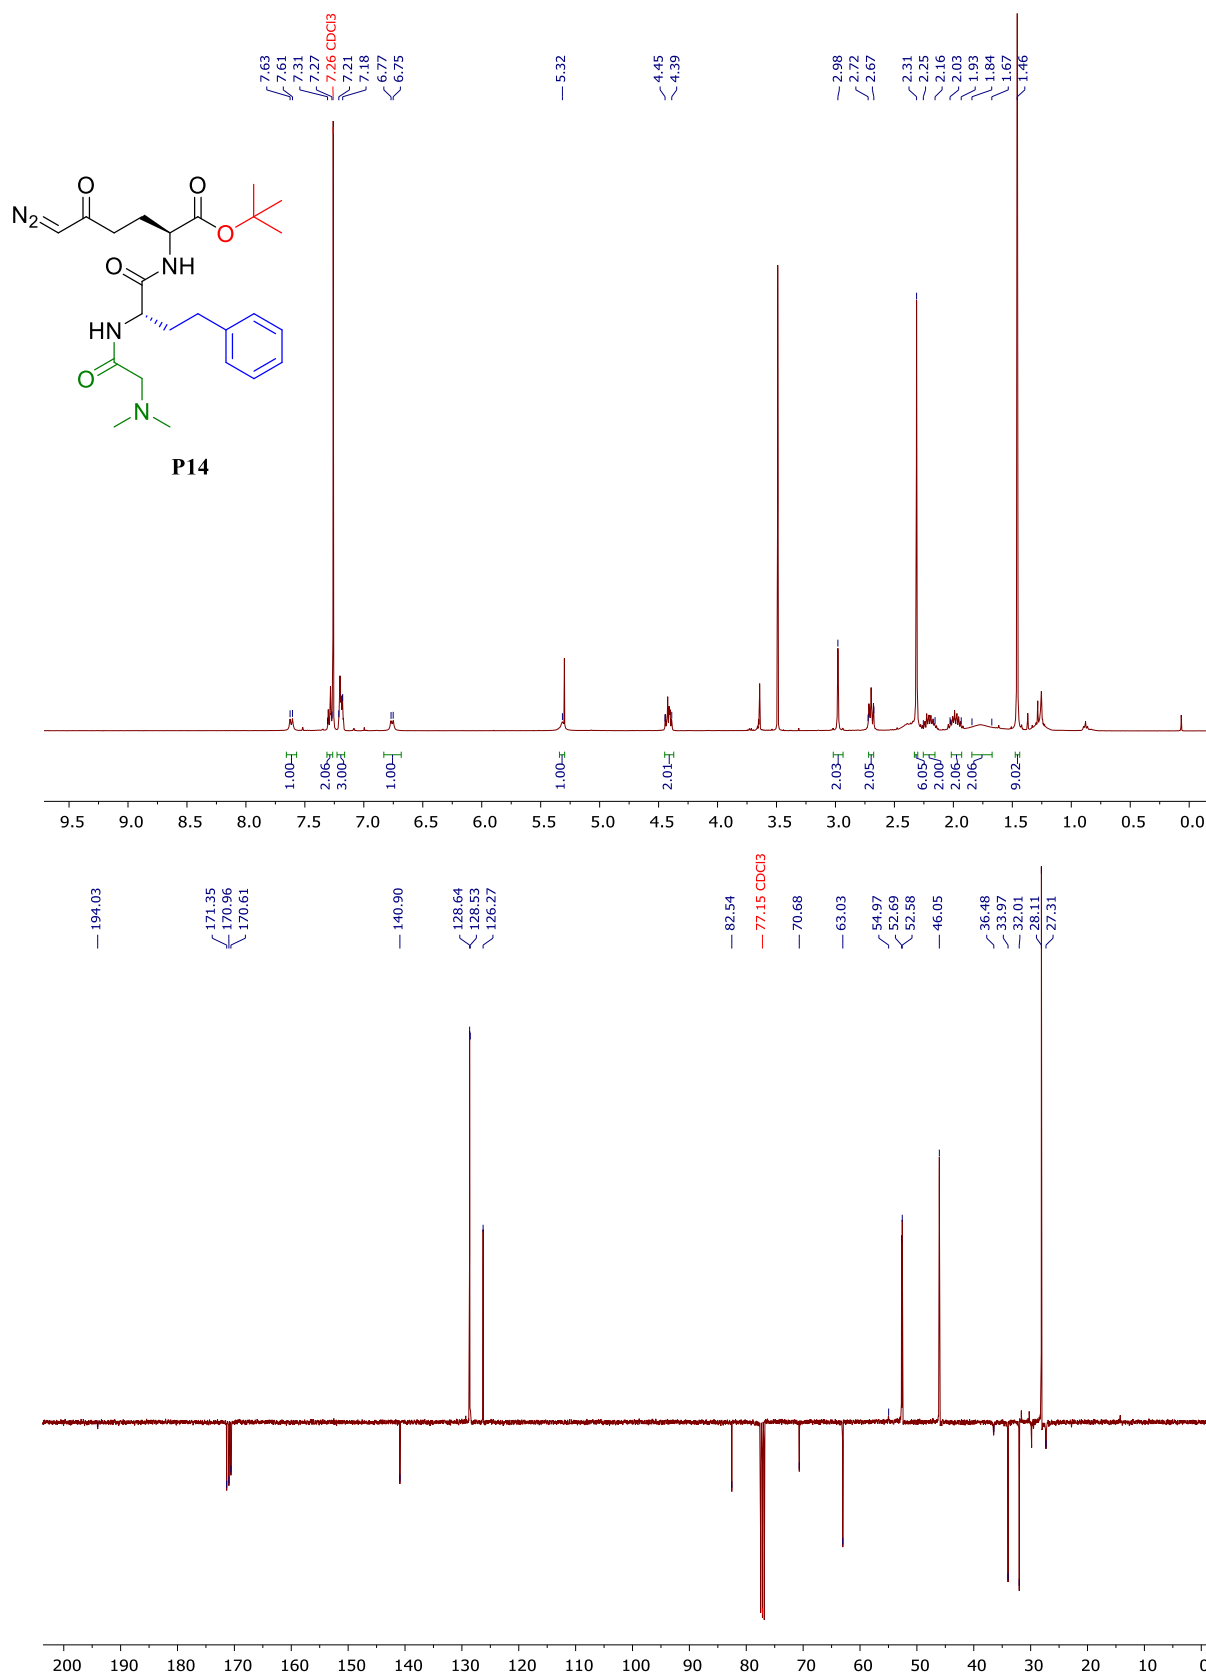



# <sup>1</sup>H and <sup>13</sup>C NMR Spectra of compound P15.

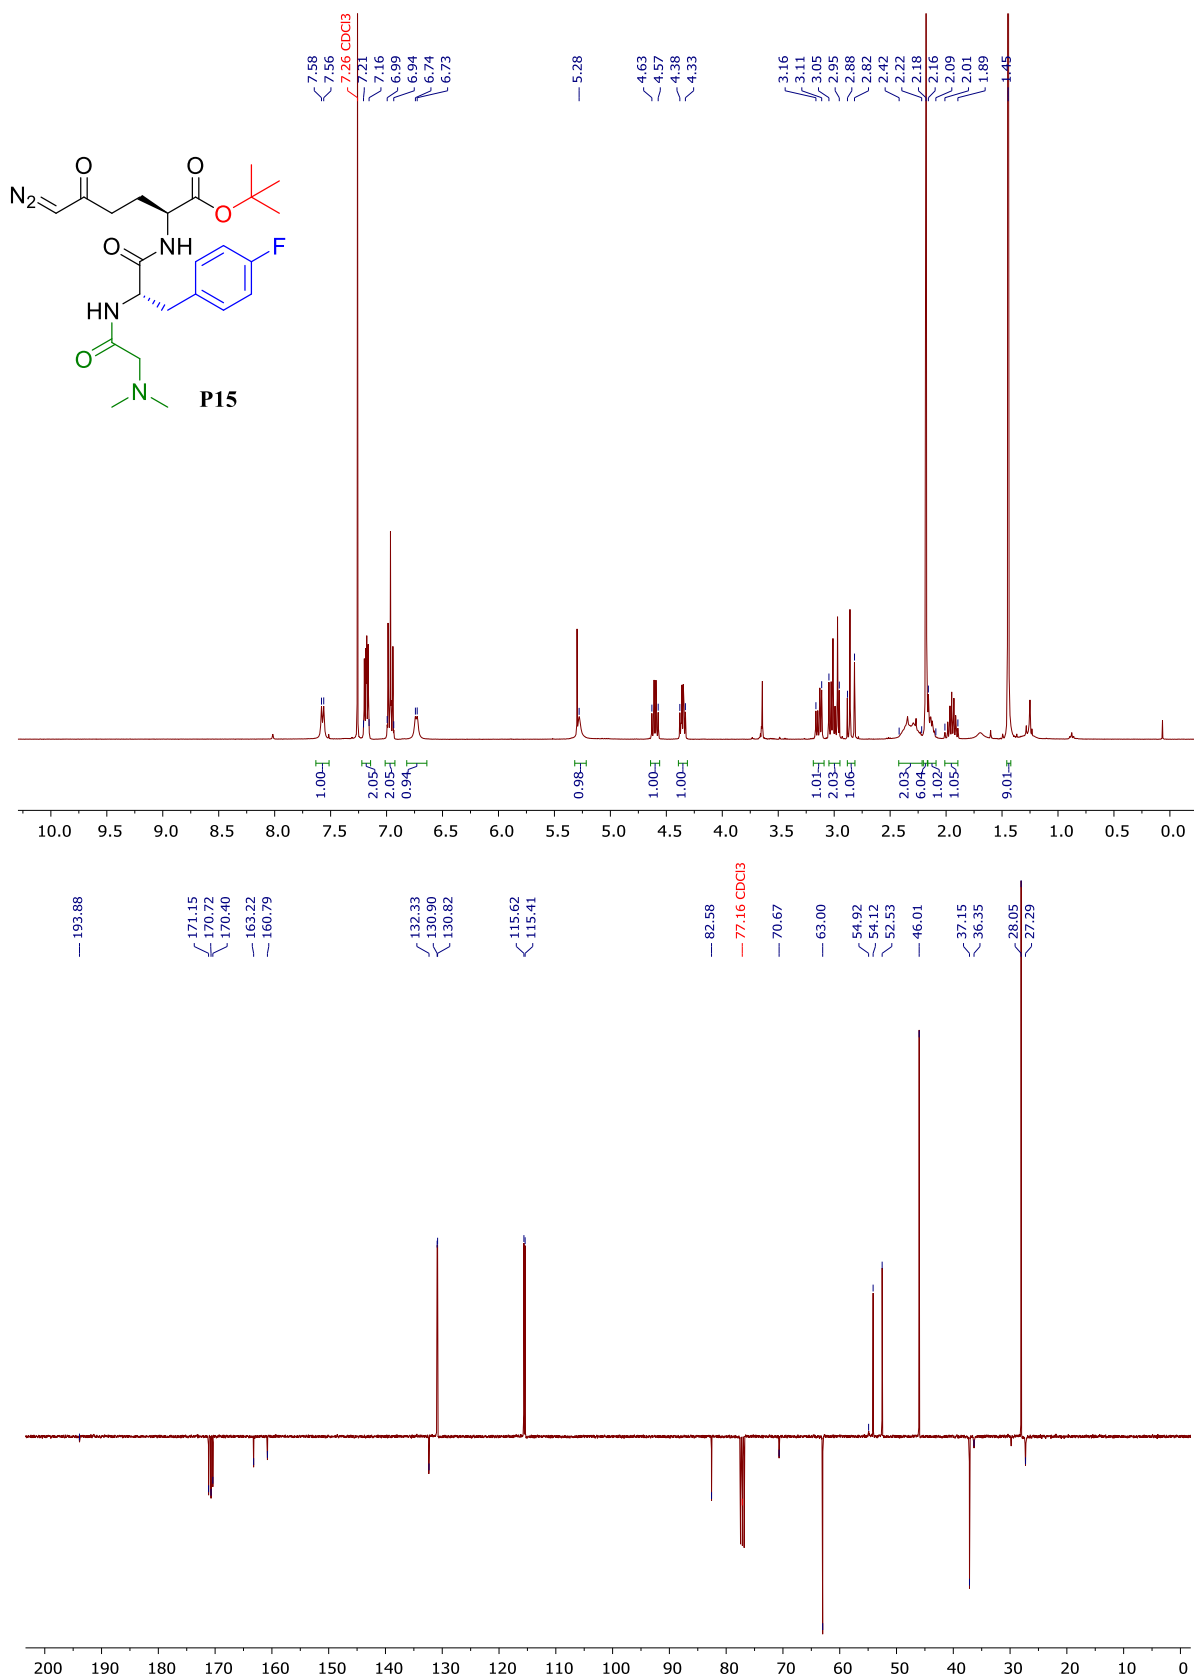

# $^1\text{H}$ and $^{13}\text{C}$ NMR Spectra of compound **P16**.

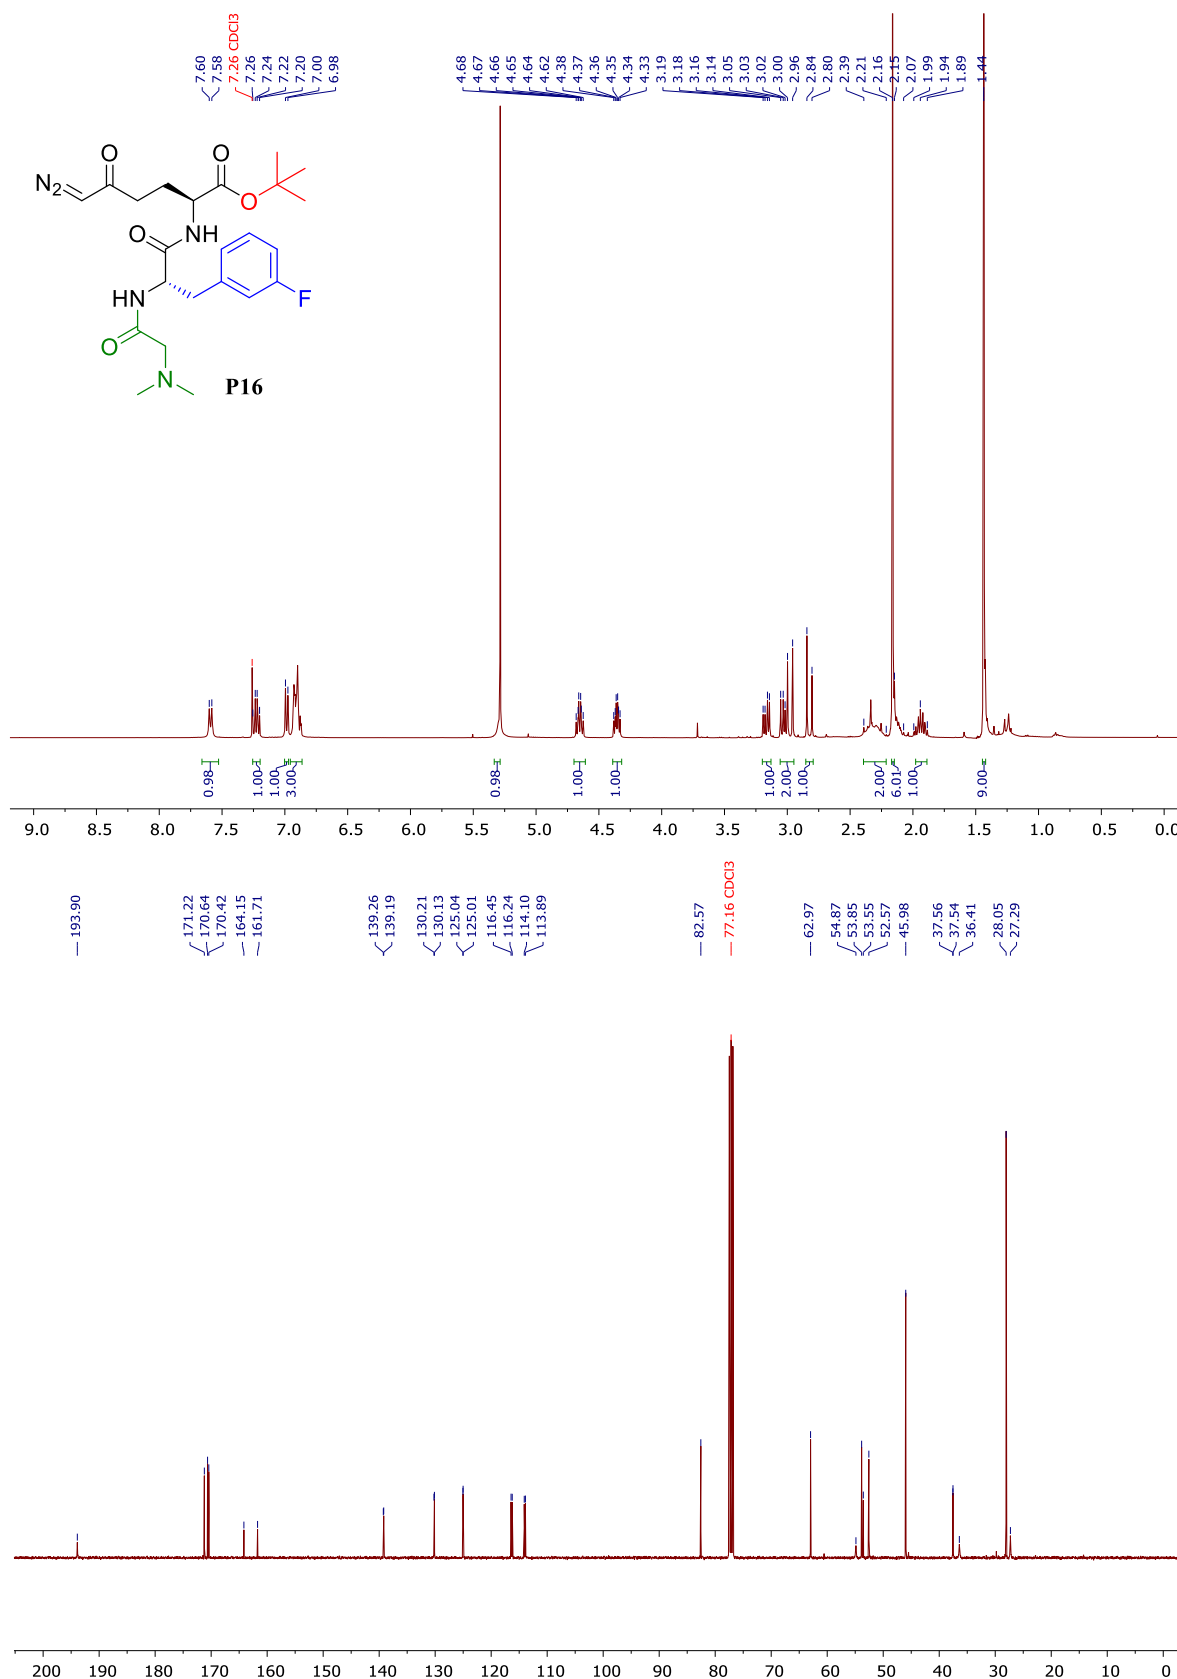

# $^1\text{H}$ and $^{13}\text{C}$ NMR Spectra of compound **P17**.

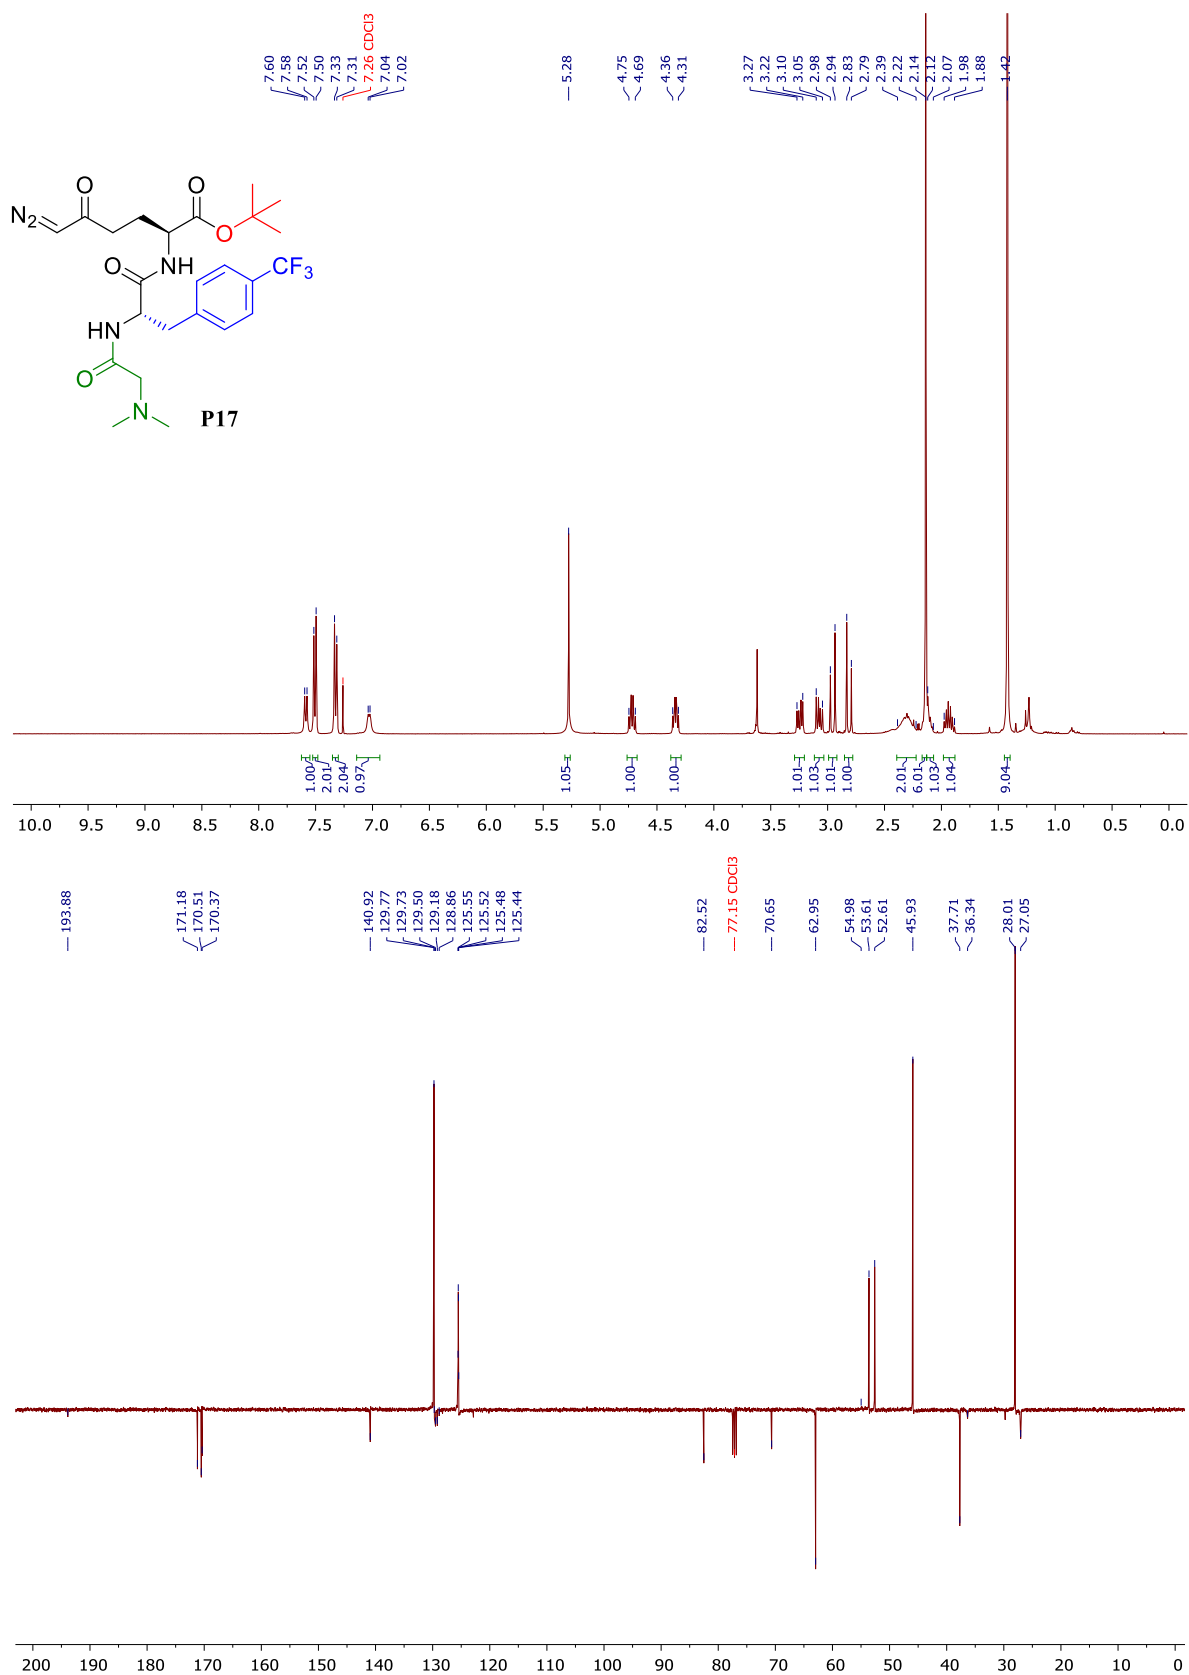

<sup>1</sup>H and <sup>13</sup>C NMR Spectra of compound **P18**.

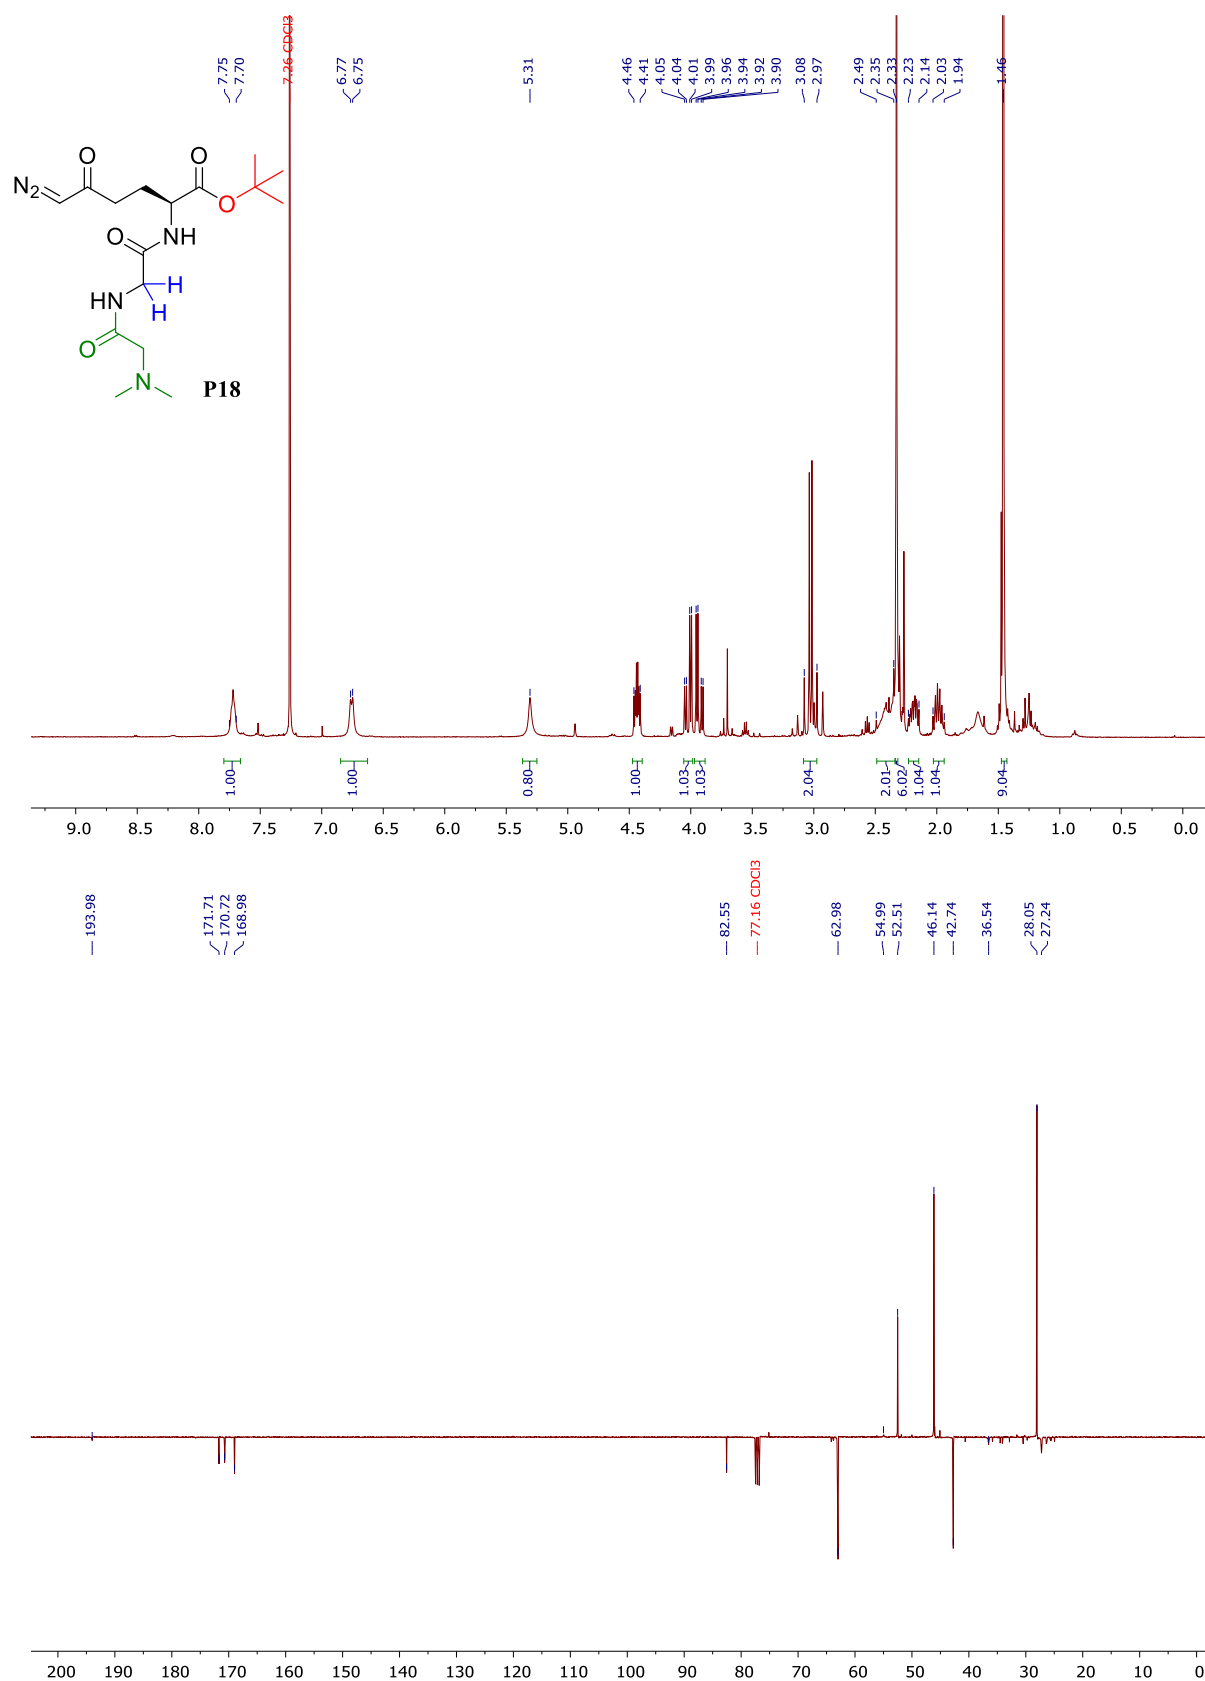

<sup>1</sup>H and <sup>13</sup>C NMR Spectra of compound **P19**.

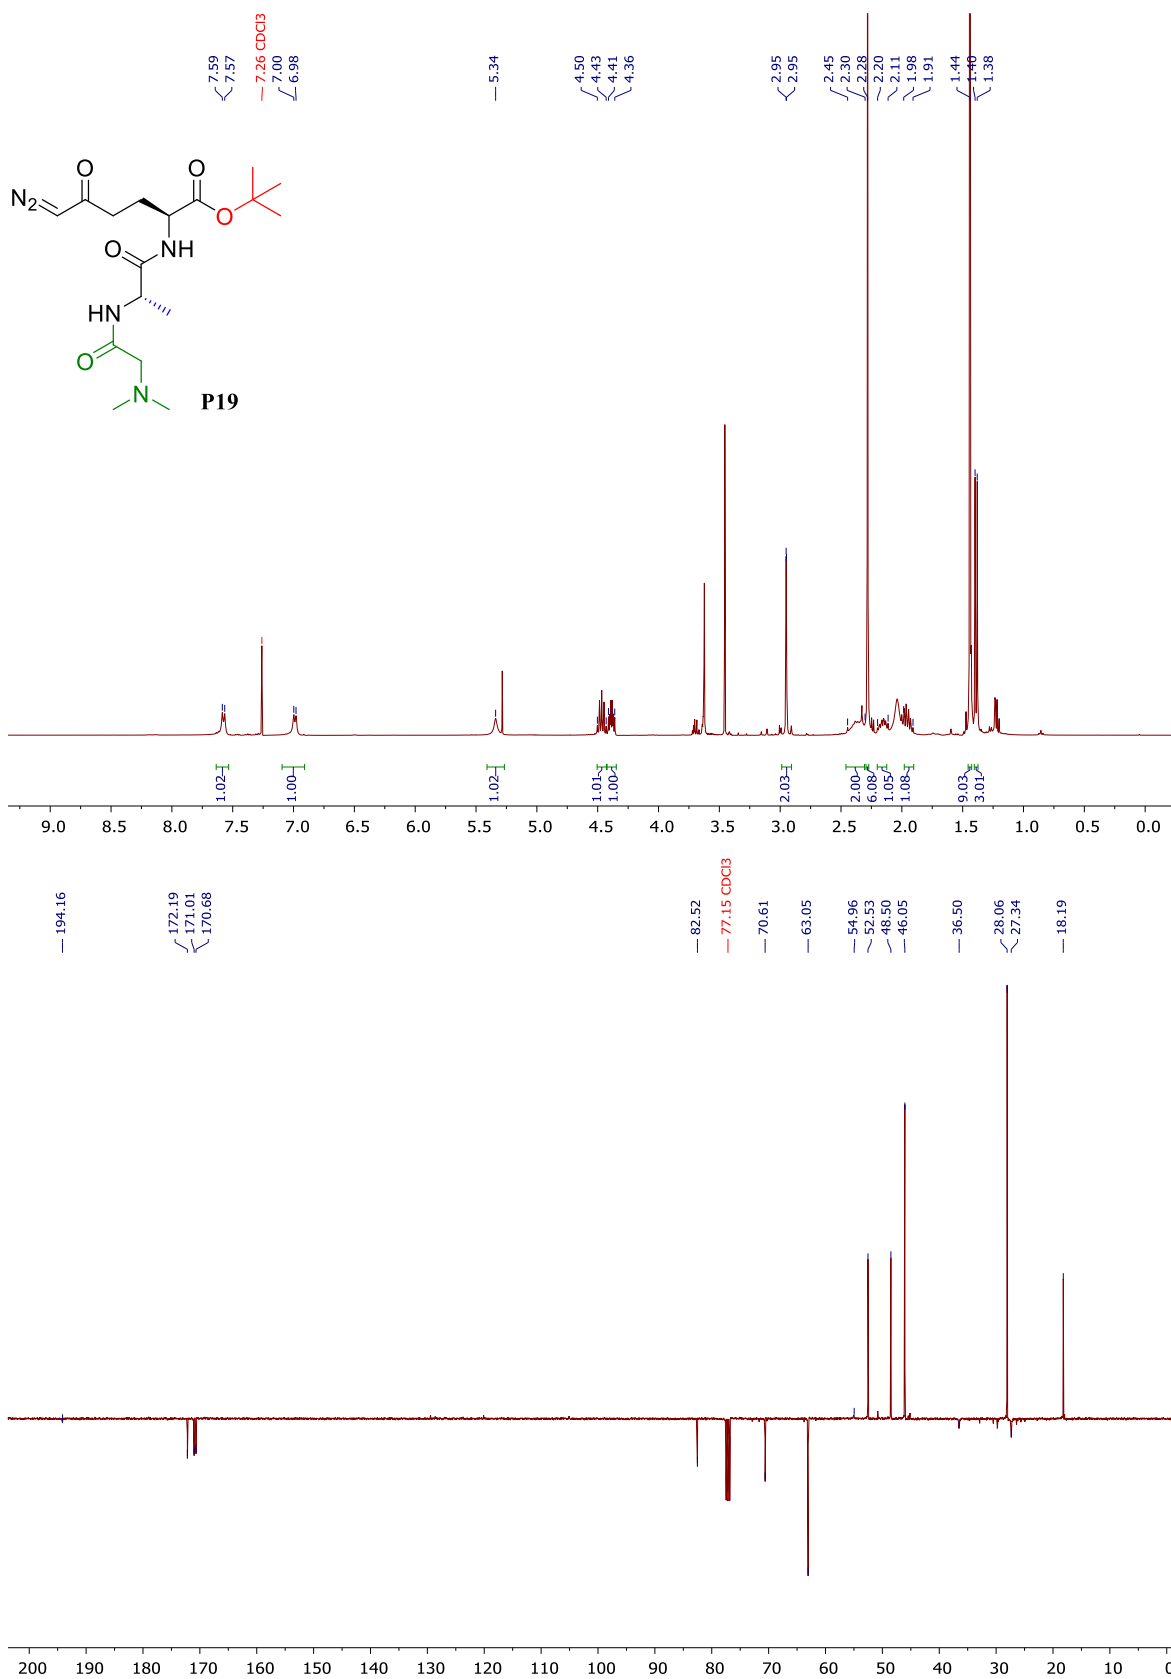

<sup>1</sup>H and <sup>13</sup>C NMR Spectra of compound **P20**.

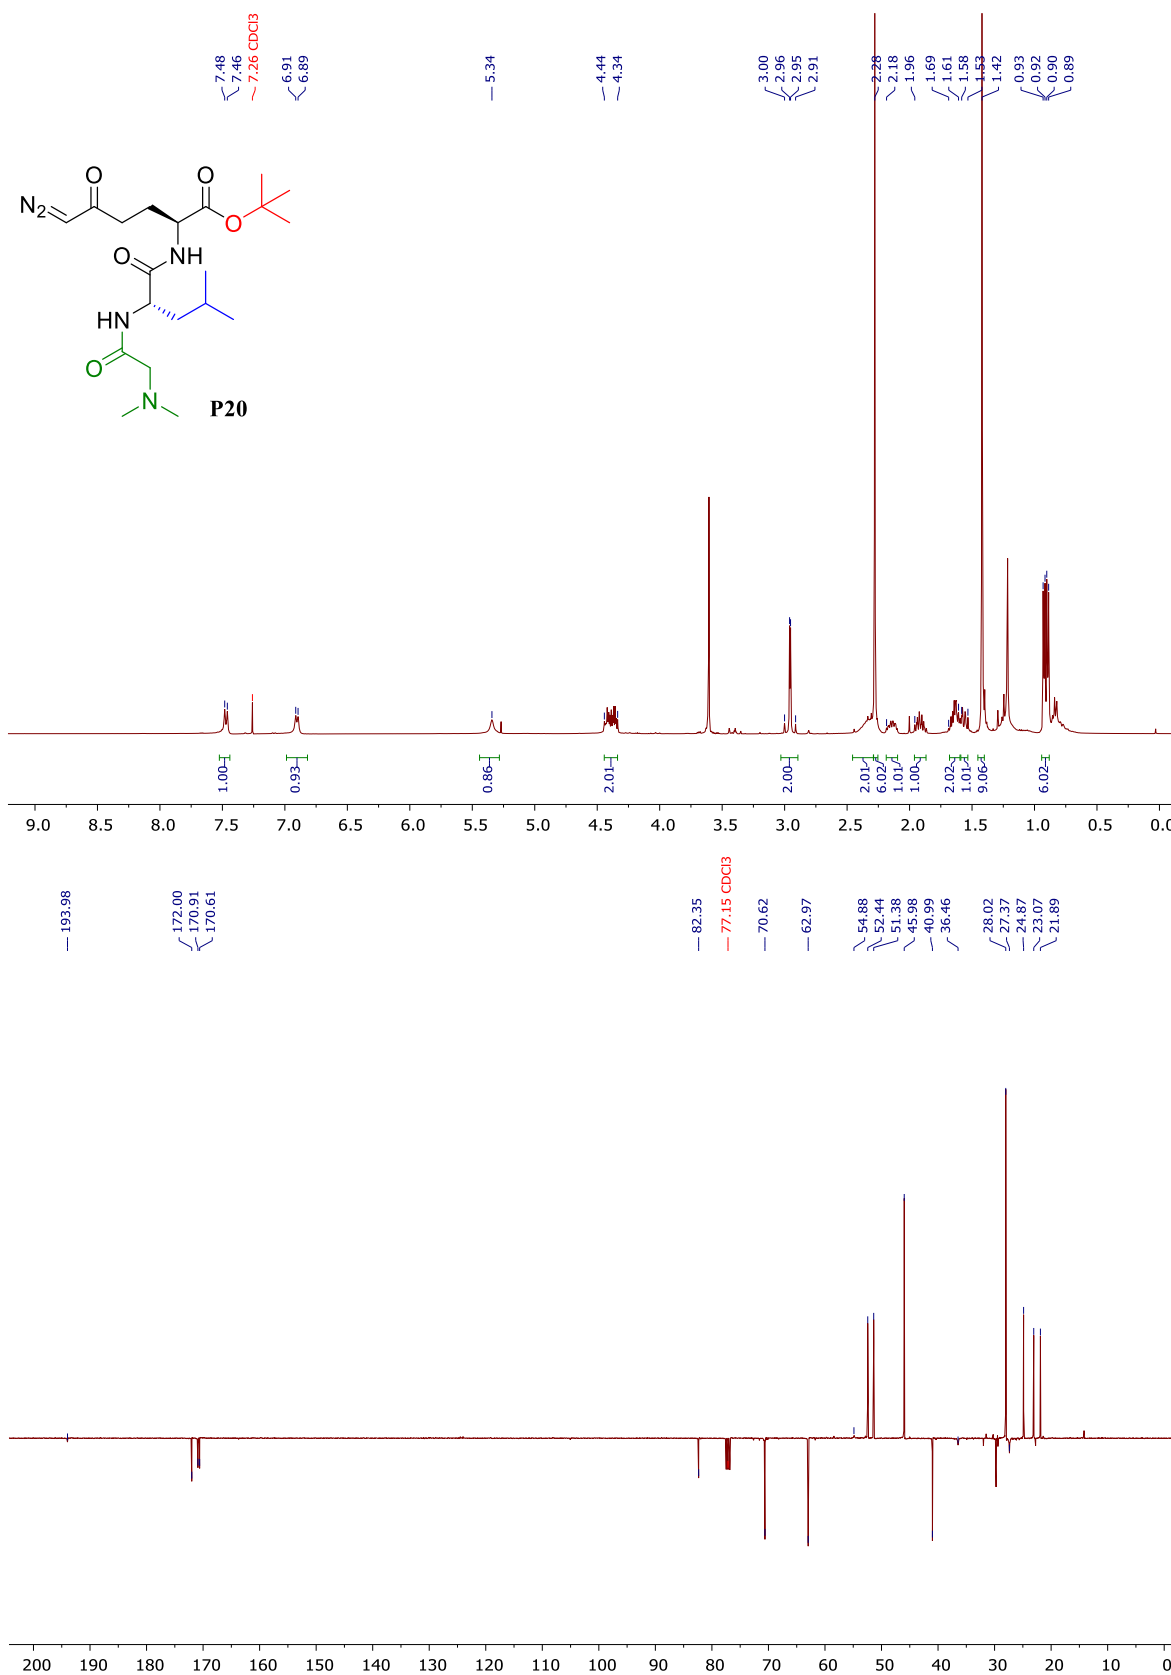

# $^1\text{H}$ and $^{13}\text{C}$ NMR Spectra of compound **P21**.

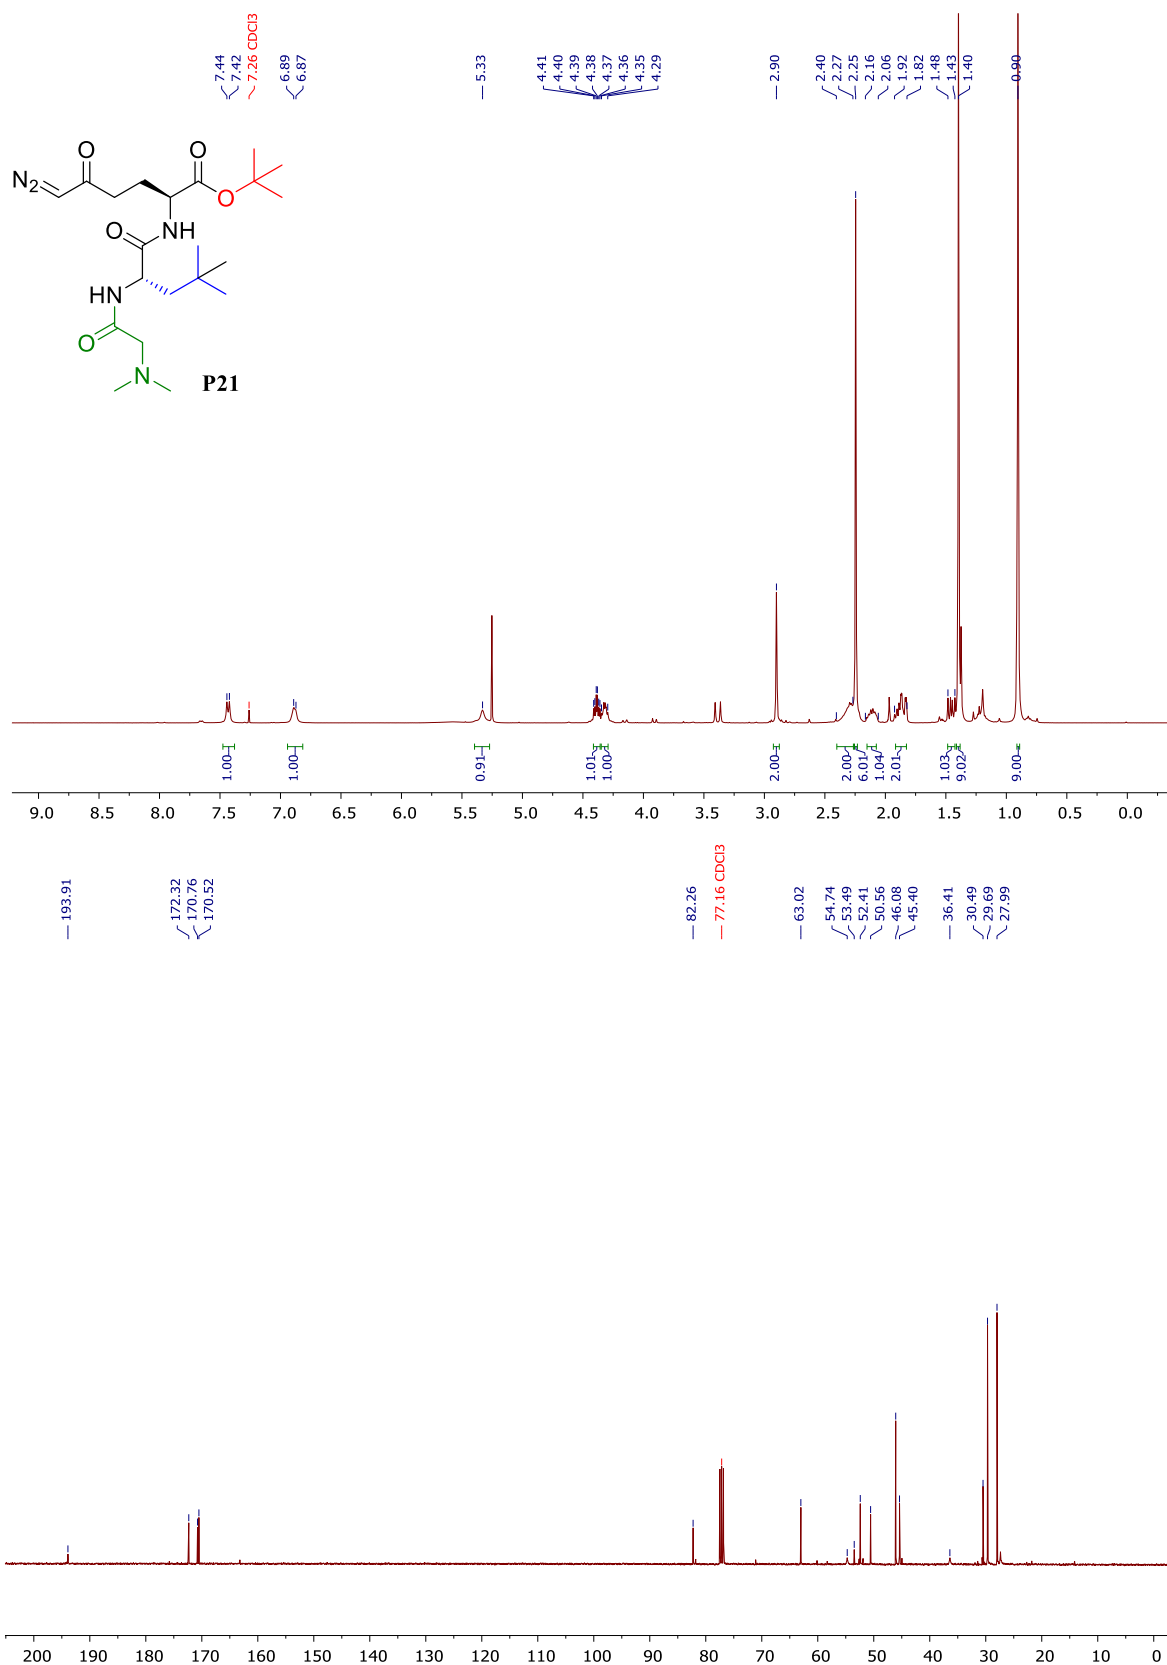

# HPLC spectra of final prodrugs P1-P21

## HPLC spectrum of prodrug P1

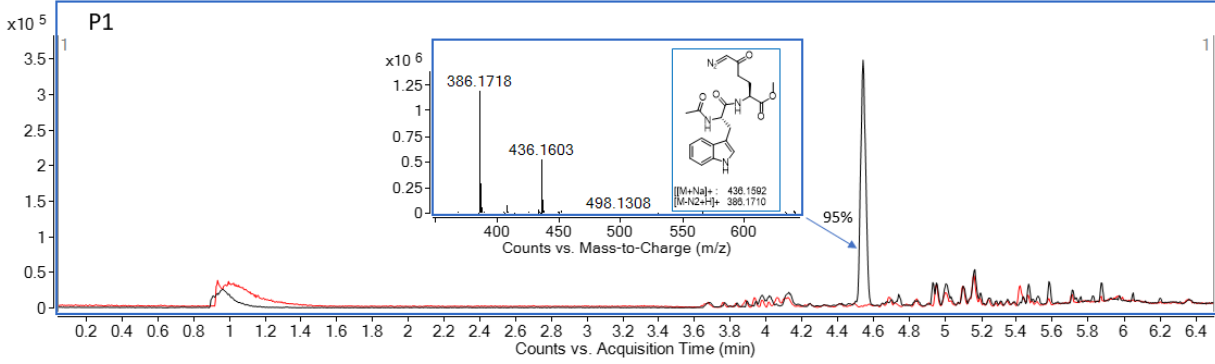

## HPLC spectrum of prodrug P2

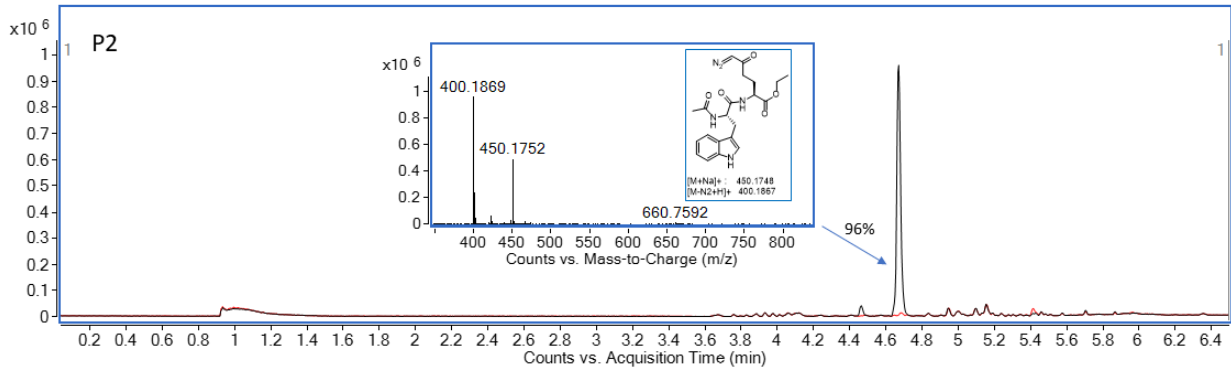

## HPLC spectrum of prodrug P3

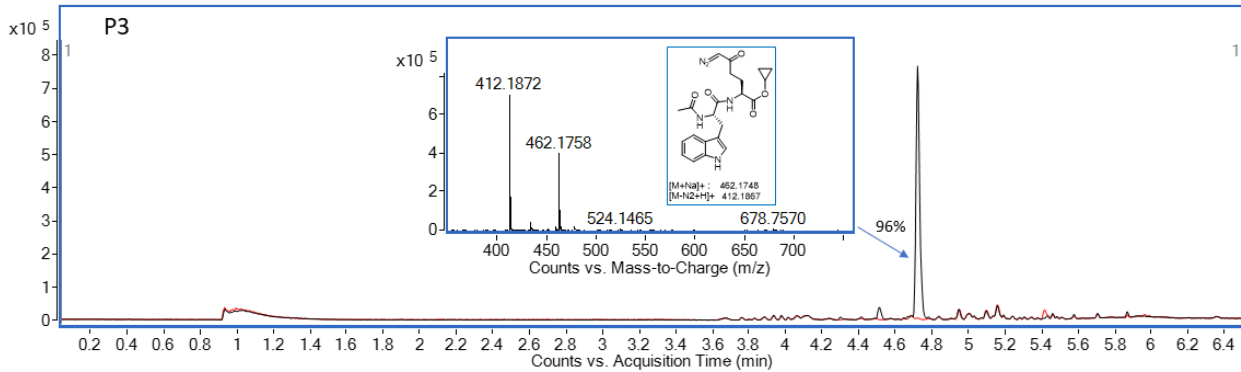



### HPLC spectrum of prodrug P4

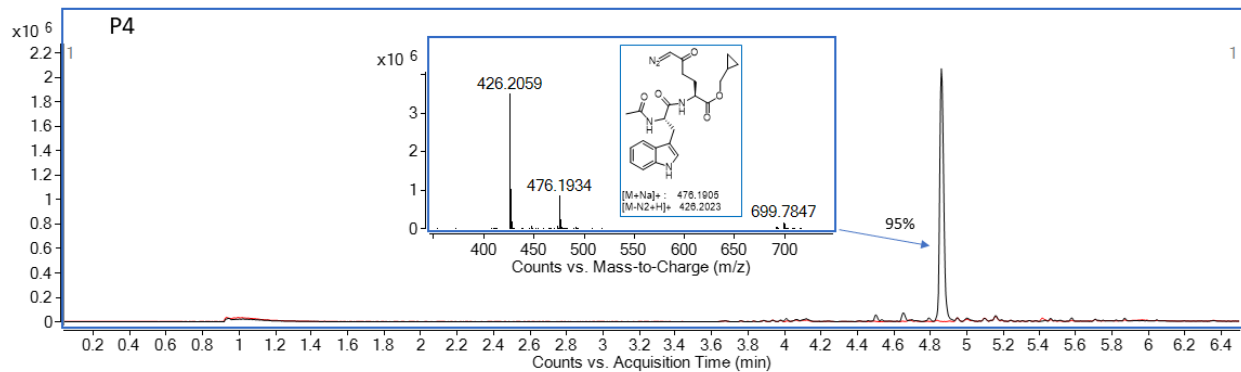

### HPLC spectrum of prodrug P5

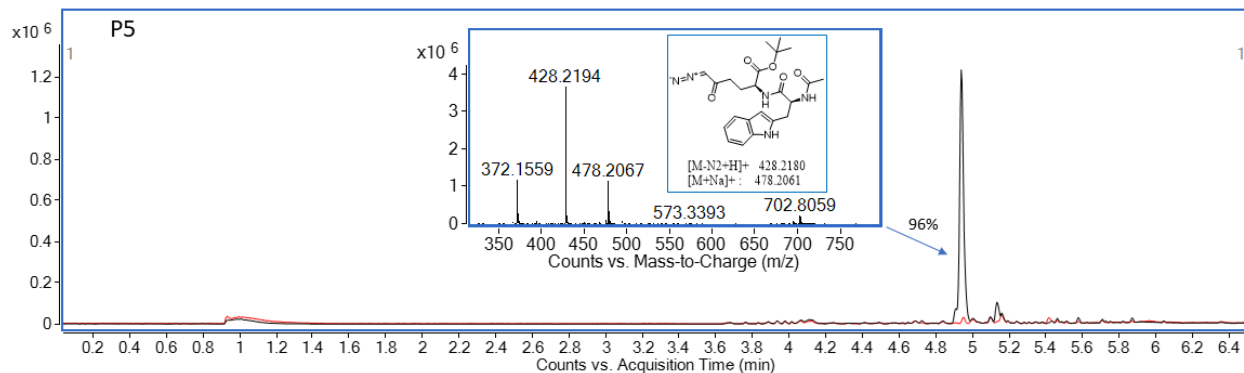

### HPLC spectrum of prodrug P6

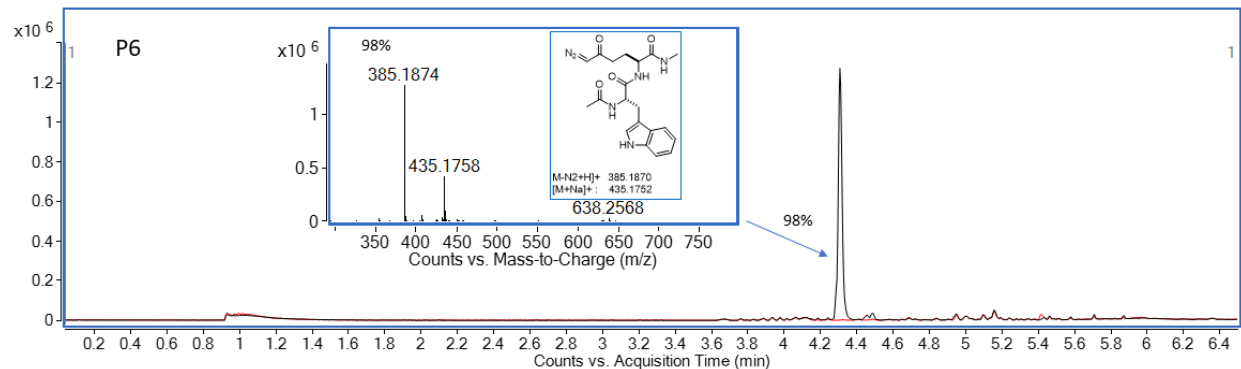

### HPLC spectrum of prodrug P7

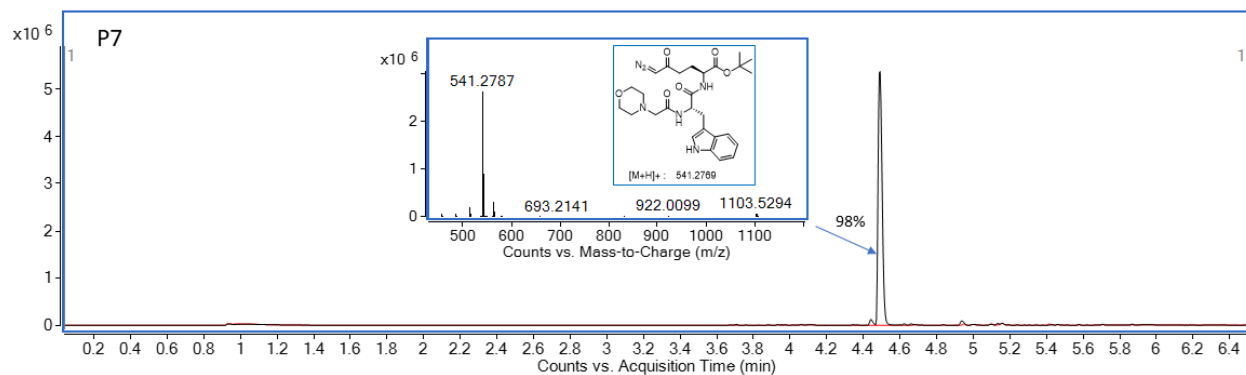

### HPLC spectrum of prodrug P8

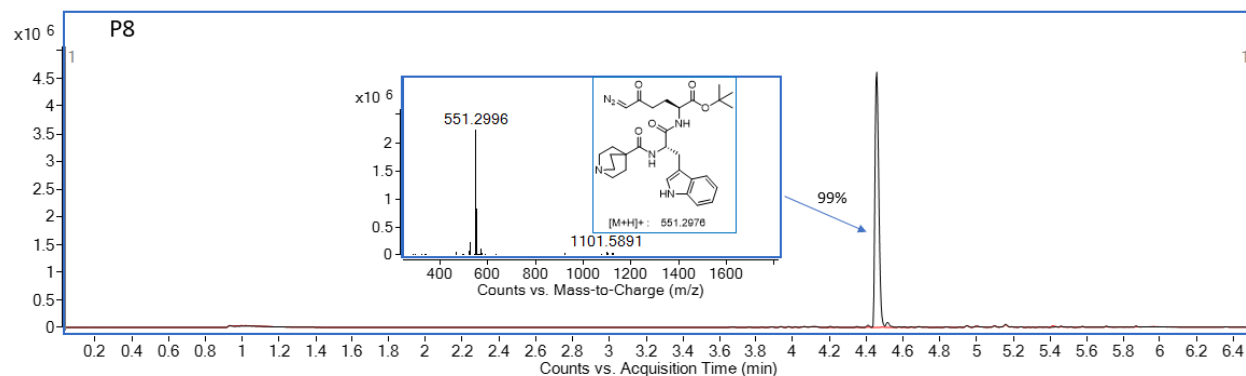

### HPLC spectrum of prodrug P9

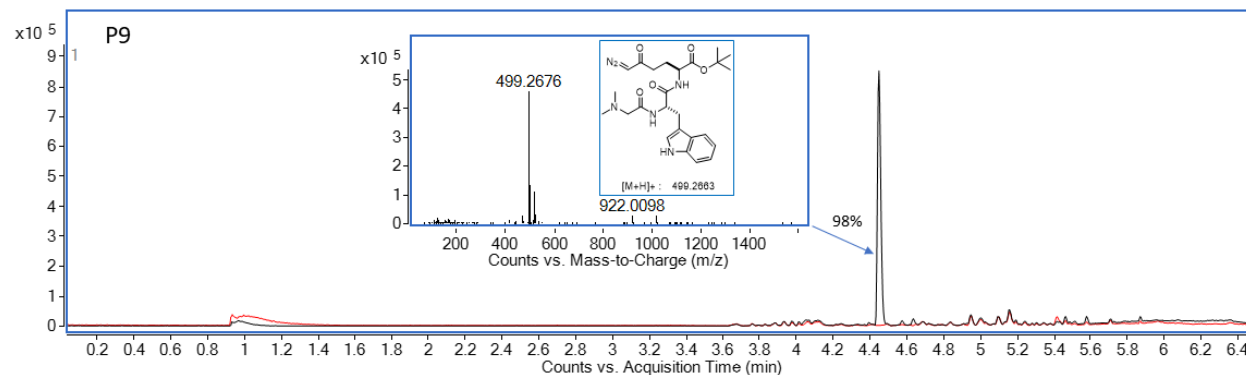

### HPLC spectrum of prodrug P10

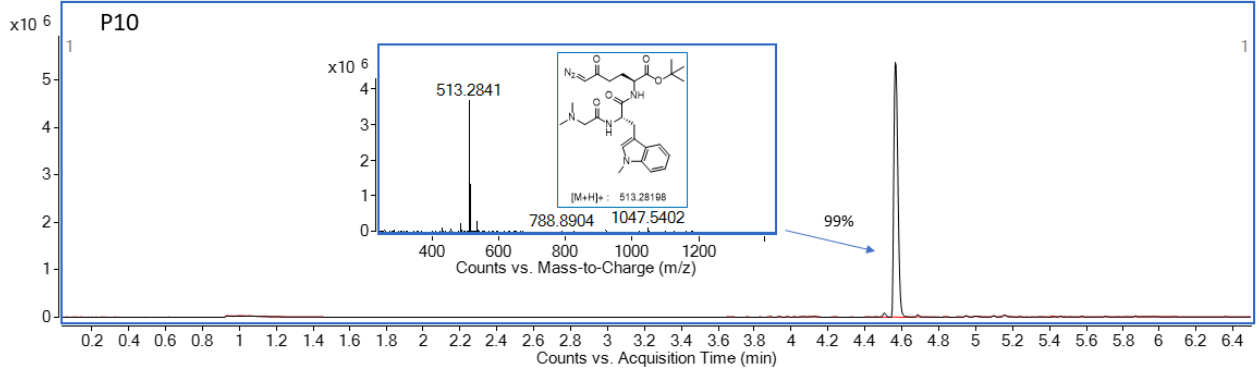

### HPLC spectrum of prodrug P11

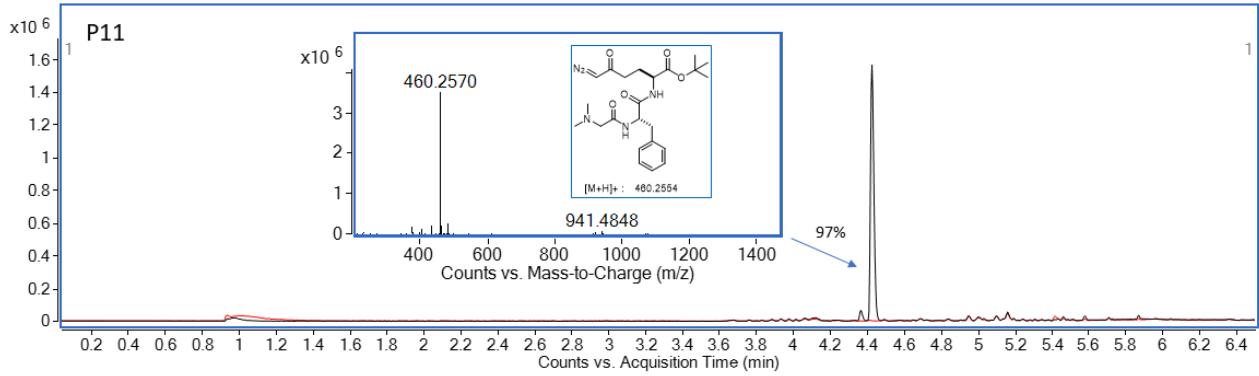

### HPLC spectrum of prodrug P12

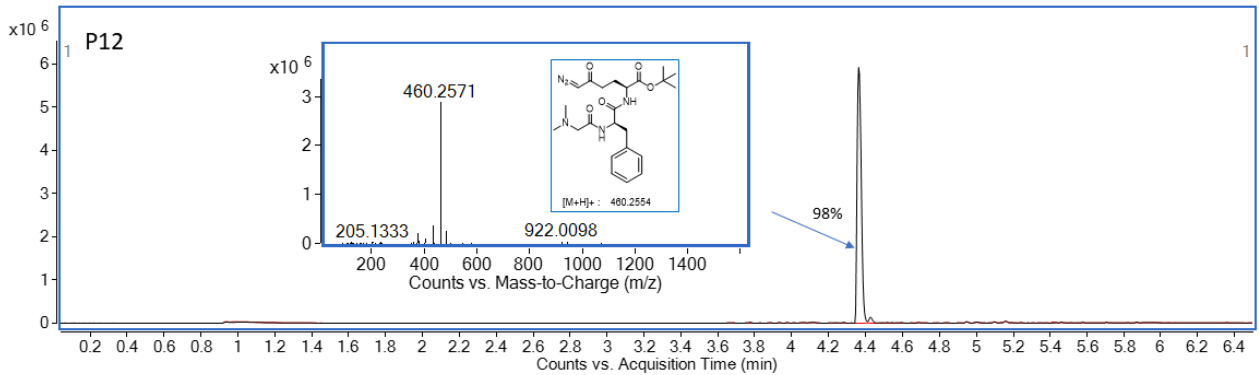

### HPLC spectrum of prodrug P13

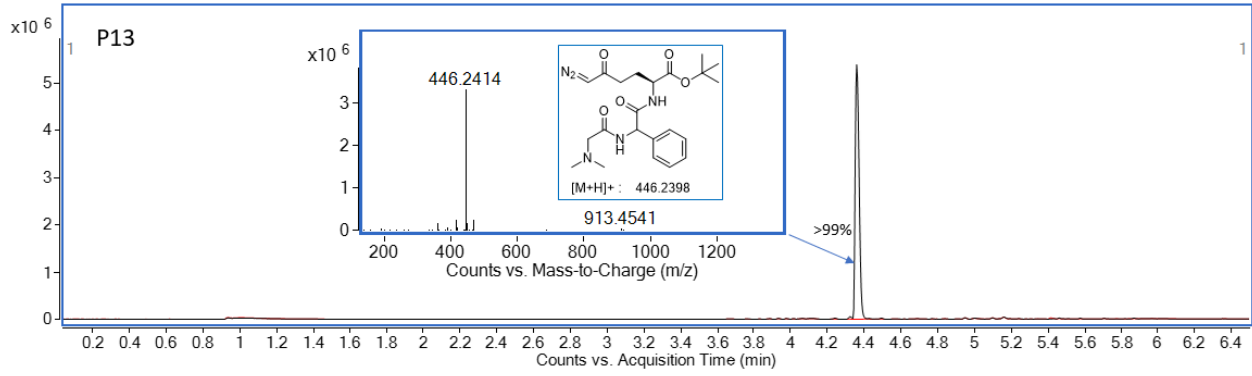

### HPLC spectrum of prodrug P14

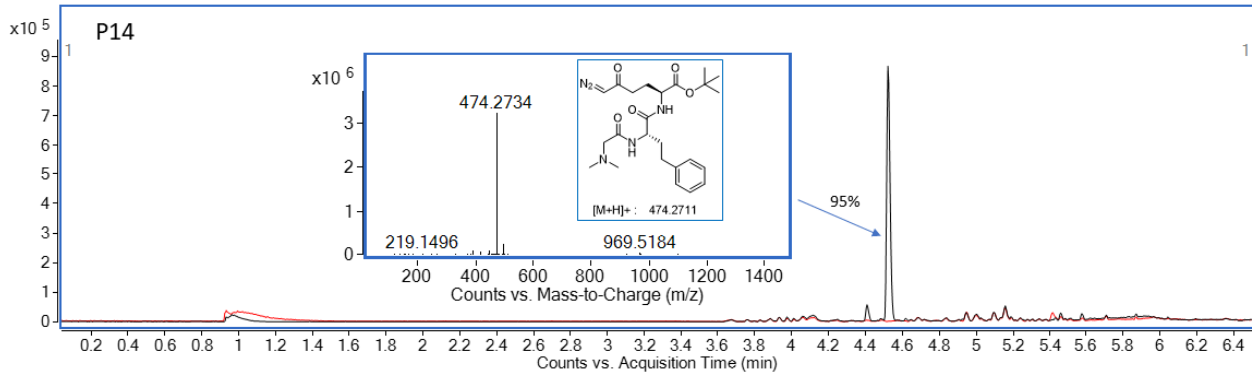

### HPLC spectrum of prodrug P15

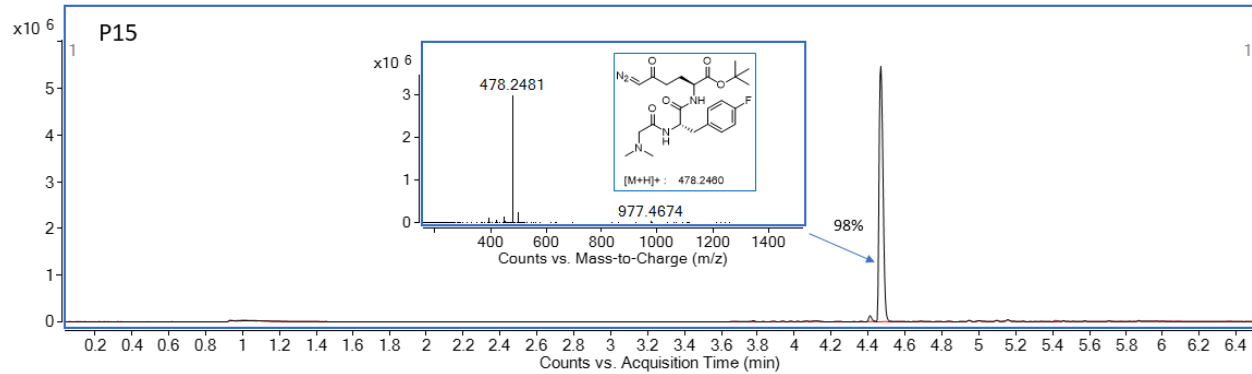



### HPLC spectrum of prodrug P19

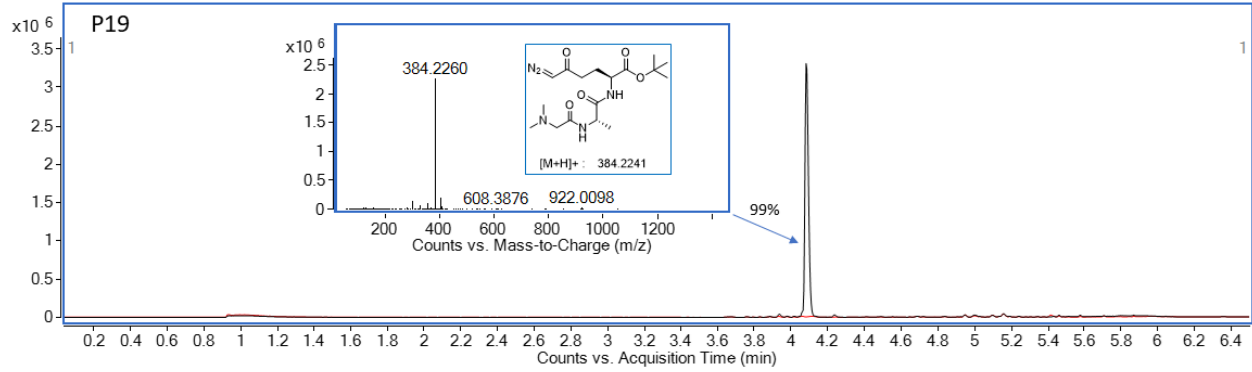

### HPLC spectrum of prodrug P20

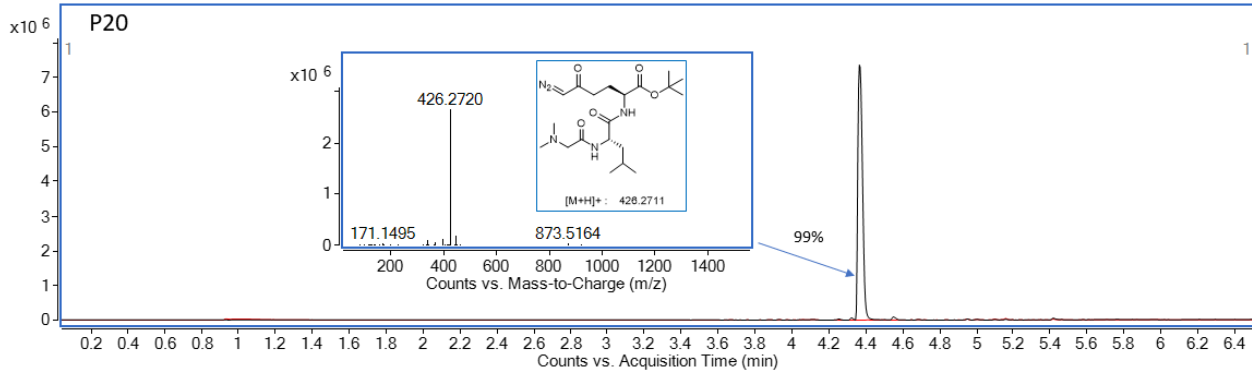

### HPLC spectrum of prodrug P21

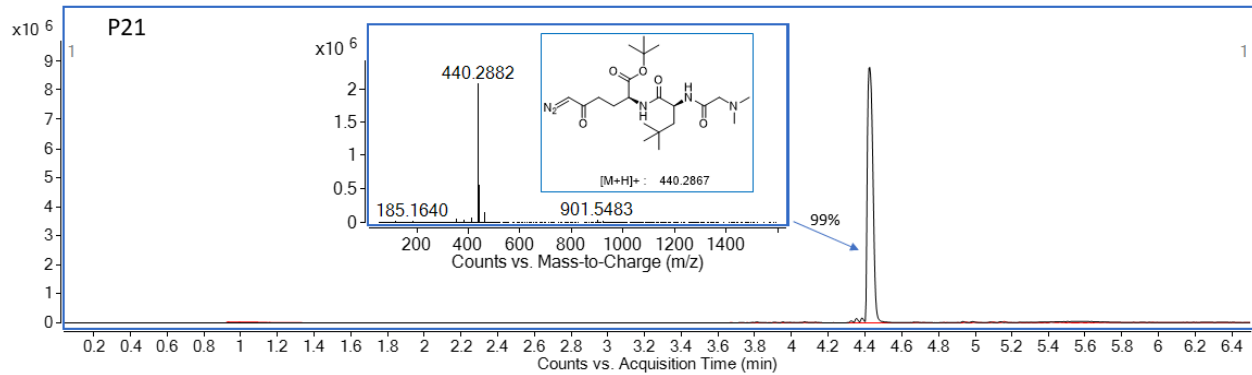

**Table S1: clogD<sub>7.4</sub>\*values of prodrugs P1-P21 and DRP-104**

| <b>Cmpd #</b>  | <b>clogD</b> |
|----------------|--------------|
| <b>DRP-104</b> | -0.07        |
| <b>P1</b>      | -0.84        |
| <b>P2</b>      | -0.48        |
| <b>P3</b>      | -0.37        |
| <b>P4</b>      | -0.06        |
| <b>P5</b>      | 0.21         |
| <b>P6</b>      | -1.57        |
| <b>P7</b>      | -0.11        |
| <b>P8</b>      | 0.41         |
| <b>P9</b>      | -0.01        |
| <b>P10</b>     | 0.21         |
| <b>P11</b>     | -0.11        |
| <b>P12</b>     | -0.11        |
| <b>P13</b>     | -0.40        |
| <b>P14</b>     | 0.34         |
| <b>P15</b>     | 0.03         |
| <b>P16</b>     | 0.03         |
| <b>P17</b>     | 0.77         |
| <b>P18</b>     | -2.33        |
| <b>P19</b>     | -1.77        |
| <b>P20</b>     | -0.51        |
| <b>P21</b>     | -0.21        |

*\*Calculated using Chemaxon online calculator*

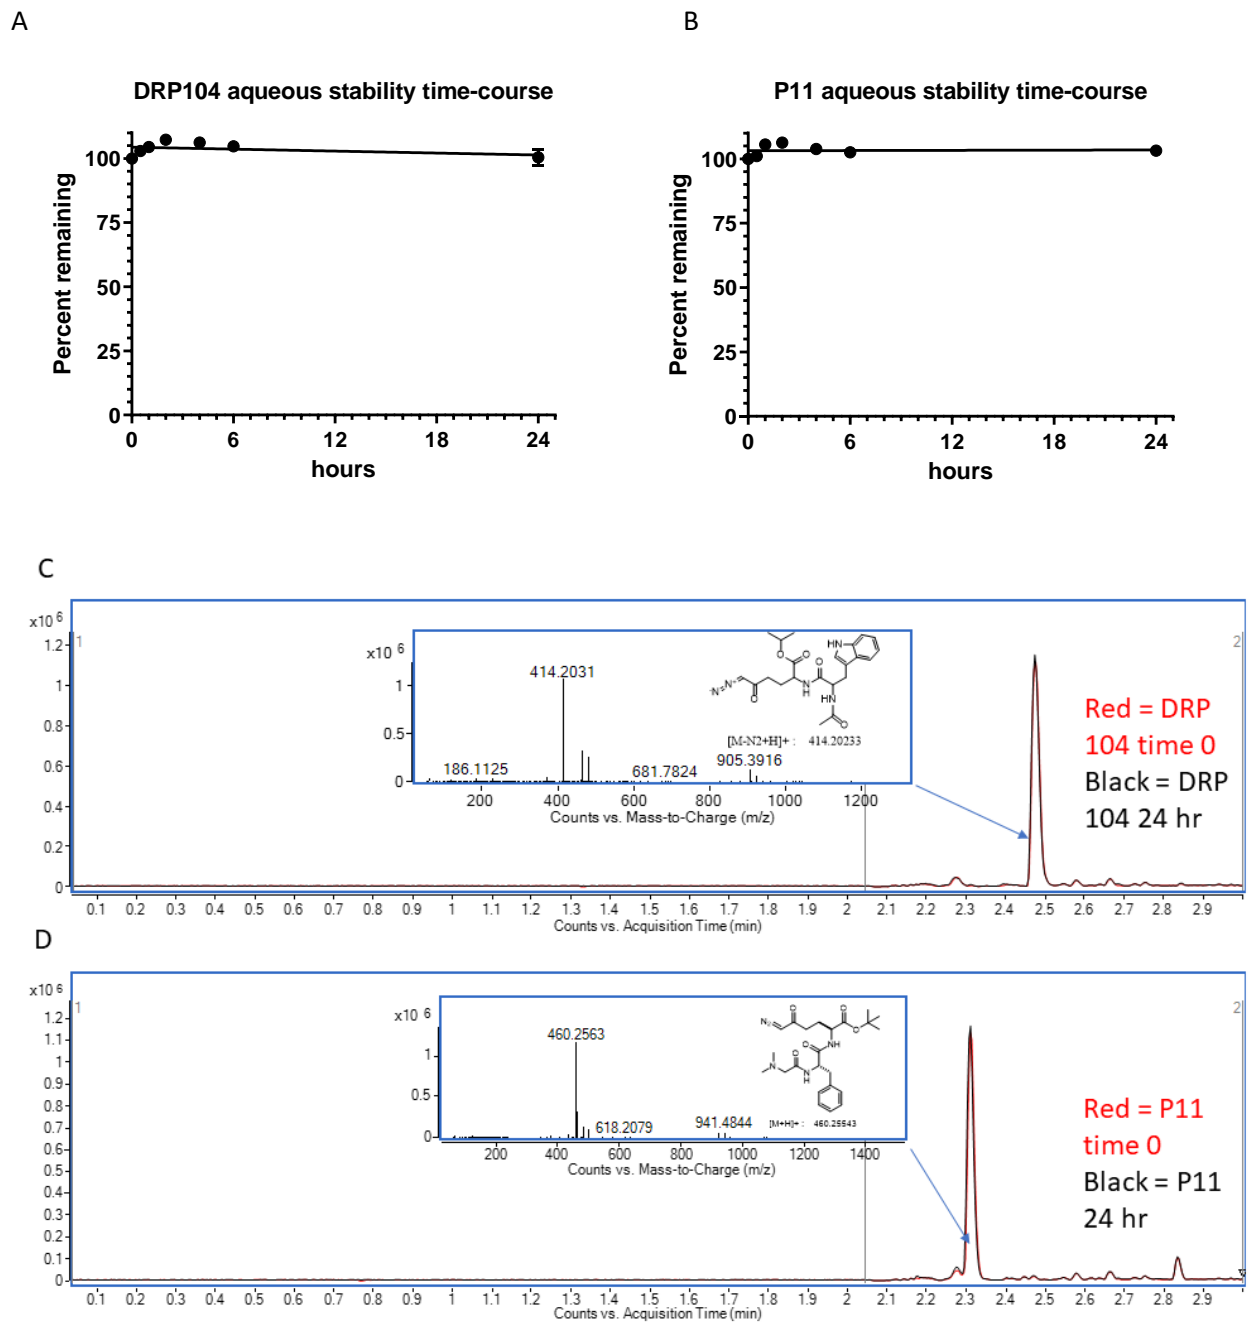

**Figure S1. Aqueous stability of DRP 104 and P11.** DRP 104 (**A**) and P11 (**B**) were spiked into PBS ( $n = 3$ ) and incubated at 37°C. Aliquots were removed at each time-point and percent remaining was measured over 24hr by LCMS; Chromatographic traces of DRP 104 (**C**) and P11 (**D**) at time 0 vs 24 h showed complete stability with no degradation.
